# Supplementary material for: A genome-wide association analysis identifies 16 novel susceptibility loci for carpal tunnel syndrome
Source: PubMed Central journal article supplement (PMC6399342; doi:10.1038/s41467-019-08993-6), 2019-03-04
Supplement: 41467_2019_8993_MOESM1_ESM.pdf [file 41467_2019_8993_MOESM1_ESM.pdf]

## **Supplementary Information**

Supplement to:

Wiberg et al. A genome-wide association analysis identifies 16 novel susceptibility loci for Carpal Tunnel Syndrome.

## Table of Contents

Supplementary Table 1. Diagnostic codes used for CTS case definition

Supplementary Table 2. Gene-based association analysis in MAGMA

Supplementary Table 3. Gene-based enrichment analysis in FUMA

Supplementary Table 4. Gene-based enrichment analysis in XGR

Supplementary Table 5. Summary-based Mendelian Randomisation (SMR) using eQTL data from GTEx v6 transformed fibroblasts

Supplementary Table 6. Partitioned CTS heritability across different cell and tissue types

Supplementary Table 7. Genetic correlation between CTS and other phenotypes

Supplementary Table 8. Gene expression of *COL11A1* and *EFEMP1* in tibial nerve and transformed fibroblasts

Supplementary Table 9. eQTLs for functional SNPs at 2p16.1 (*EFEMP1* locus)

Supplementary Figure 1. Overview of Quality Control (QC)

Supplementary Figure 2. Heat map of gene expression in 53 tissue types

Supplementary Figure 3. Gene-based association analysis Manhattan plot

Supplementary Figure 4. Gene-property analysis in MAGMA

Supplementary Figure 5. Partitioned CTS heritability across genomic functional categories

Supplementary Figure 6. Hierarchical clustering of samples in RNA-Seq

Supplementary Figure 7. Regional plots for all GWAS-associated loci

Supplementary Discussion

Supplementary References

**Supplementary Table 1. Diagnostic codes used for CTS case definition.** The number of individuals with each of the diagnostic codes are shown below. Following sample QC, a total of 12,312 individuals had at least one of the diagnostic codes for CTS.

**Carpal Tunnel Syndrome**

| Source of Data                    | UK Biobank Data Field | Code         | Description                                                | N            |
|-----------------------------------|-----------------------|--------------|------------------------------------------------------------|--------------|
| Primary ICD-10                    | 41202                 | G560         | Carpal Tunnel Syndrome                                     | 9139         |
| Secondary ICD-10                  | 41204                 | G560         | As above                                                   | 648          |
| Primary OPCS                      | 41200                 | A651<br>A692 | Carpal Tunnel Release<br>Revision of Carpal Tunnel Release | 9071<br>97   |
| Secondary OPCS                    | 41210                 | A651<br>A692 | Carpal Tunnel Release<br>Revision of Carpal Tunnel Release | 452<br>7     |
| Non-cancer illness (self-report)  | 20002                 | 1541         | Carpal Tunnel Syndrome                                     | 965          |
| Operation (self-report)           | 20004                 | 1501         | Carpal Tunnel Surgery                                      | 4584         |
| <b>Total (excluding overlaps)</b> |                       |              |                                                            | <b>12312</b> |

**Supplementary Table 2. Gene-based association analysis in MAGMA.** Seventeen genes met the threshold for genome-wide significance ( $p < 2.68 \times 10^{-6}$ ) in this analysis.

| Gene <sup>a</sup>      | Chromosome | P-value               |
|------------------------|------------|-----------------------|
| <i>LOXL4</i>           | 10         | $9.47 \times 10^{-9}$ |
| <i>R3HCC1L</i>         | 10         | $7.08 \times 10^{-8}$ |
| <b><i>COL11A1</i></b>  | 1          | $1.07 \times 10^{-7}$ |
| <b><i>SMAD6</i></b>    | 15         | $1.59 \times 10^{-7}$ |
| <i>PTPN9</i>           | 15         | $1.66 \times 10^{-7}$ |
| <i>HASI</i>            | 19         | $1.87 \times 10^{-7}$ |
| <i>ZBTB38</i>          | 3          | $2.13 \times 10^{-7}$ |
| <i>AFF1</i>            | 4          | $3.80 \times 10^{-7}$ |
| <b><i>ADAMTS17</i></b> | 15         | $4.88 \times 10^{-7}$ |
| <i>PBX3</i>            | 9          | $4.90 \times 10^{-7}$ |
| <b><i>KIAA1715</i></b> | 2          | $5.83 \times 10^{-7}$ |
| <i>XRCC6</i>           | 22         | $7.30 \times 10^{-7}$ |
| <i>AOC1</i>            | 7          | $1.10 \times 10^{-6}$ |
| <i>CCDC134</i>         | 22         | $1.69 \times 10^{-6}$ |
| <b><i>AEBP1</i></b>    | 7          | $2.32 \times 10^{-6}$ |
| <b><i>EFEMP1</i></b>   | 2          | $2.40 \times 10^{-6}$ |
| <i>SIN3A</i>           | 15         | $2.55 \times 10^{-6}$ |

<sup>a</sup>Genes highlighted in bold were also prioritised by positional mapping in FUMA.

**Supplementary Table 3. Gene-based enrichment analysis in FUMA.** This analysis was performed using the GENE2FUNC tool in FUMA, using the 25 positionally mapped genes in FUMA and the 17 genes from the MAGMA gene-based analysis. N = number of genes in the ontology; n = number of overlapped genes.

| <b>25 genes from FUMA positional mapping</b>     |          |          |                        |                         |                                                                 |
|--------------------------------------------------|----------|----------|------------------------|-------------------------|-----------------------------------------------------------------|
| <i>GO Cellular components</i>                    |          |          |                        |                         |                                                                 |
| <b>GeneSet</b>                                   | <b>N</b> | <b>n</b> | <b>P-value</b>         | <b>Adjusted P-value</b> | <b>Genes</b>                                                    |
| GO_EXTRACELLULAR_MATRIX                          | 424      | 7        | 4.67×10 <sup>-11</sup> | 2.71×10 <sup>-8</sup>   | <i>COL11A1, TGFB3, ADAMTS17, ADAMTS10, LTBP1, EFEMP1, AEBP1</i> |
| GO_PROTEINACEOUS_EXTRACELLULAR_MATRIX            | 355      | 5        | 3.50×10 <sup>-8</sup>  | 6.77×10 <sup>-6</sup>   | <i>COL11A1, ADAMTS17, ADAMTS10, LTBP1, EFEMP1</i>               |
| GO_EXTRACELLULAR_SPACE                           | 1367     | 5        | 8.30×10 <sup>-5</sup>  | 4.81×10 <sup>-3</sup>   | <i>TGFB3, EFEMP1, MUC13, AEBP1, AOC1</i>                        |
| GO_CYTOSKELETON                                  | 1965     | 5        | 5.95×10 <sup>-4</sup>  | 2.30×10 <sup>-2</sup>   | <i>TLL5, MYO1F, KALRN, MYL7, GCK</i>                            |
| <i>GWAS Catalog Reported Genes</i>               |          |          |                        |                         |                                                                 |
| <b>Gene Set</b>                                  | <b>N</b> | <b>n</b> | <b>P-value</b>         | <b>Adjusted P-value</b> | <b>Genes</b>                                                    |
| Waist circumference adjusted for body mass index | 126      | 5        | 7.01×10 <sup>-11</sup> | 8.57×10 <sup>-8</sup>   | <i>ADAMTS17, MYO1F, ADAMTS10, LTBP1, EFEMP1</i>                 |
| Height                                           | 522      | 7        | 2.42×10 <sup>-10</sup> | 1.48×10 <sup>-7</sup>   | <i>TLL5, ADAMTS17, MYO1F, ADAMTS10, LTBP1, EFEMP1, TMEM176A</i> |
| <b>17 genes from MAGMA gene-based analysis</b>   |          |          |                        |                         |                                                                 |
| <i>GO Cellular components</i>                    |          |          |                        |                         |                                                                 |
| <b>Gene set</b>                                  | <b>N</b> | <b>n</b> | <b>P-value</b>         | <b>Adjusted P-value</b> | <b>Genes</b>                                                    |
| GO_EXTRACELLULAR_SPACE                           | 1367     | 5        | 2.93×10 <sup>-5</sup>  | 1.55×10 <sup>-3</sup>   | <i>LOXL4, EFEMP1, ZBTB38, AEBP1, AOC1</i>                       |
| <i>GWAS Catalog Reported Genes</i>               |          |          |                        |                         |                                                                 |
| <b>Gene set</b>                                  | <b>N</b> | <b>n</b> | <b>P-value</b>         | <b>Adjusted P-value</b> | <b>Genes</b>                                                    |
| Height                                           | 522      | 5        | 1.12×10 <sup>-7</sup>  | 4.54×10 <sup>-5</sup>   | <i>SIN3A, PTPN9, ADAMTS17, EFEMP1, ZBTB38</i>                   |

**Supplementary Table 4. Gene-based enrichment analysis in XGR.** We used the XGR Gene-based Enrichment Analysis function (selecting ‘canonical pathways’) to classify the 25 genes mapped by FUMA into different functional categories. The Z-scores, p-values, FDR, and the overlapped genes for each of the ontologies are shown.

| <b>Term Name</b>                                                                                                          | <b>Z-Score</b> | <b>P-value</b> | <b>FDR</b> | <b>Number of overlapped genes</b> | <b>Genes</b>                                                           |
|---------------------------------------------------------------------------------------------------------------------------|----------------|----------------|------------|-----------------------------------|------------------------------------------------------------------------|
| Ensemble of genes encoding core extracellular matrix including ECM glycoproteins, collagens and proteoglycans             | 3.24           | 0.0016         | 0.0032     | 4                                 | <i>AEBP1, COL11A1, EFEMP1, LTBP1</i>                                   |
| Ensemble of genes encoding extracellular matrix and extracellular matrix-associated proteins                              | 2.79           | 0.0016         | 0.0032     | 8                                 | <i>ADAMTS10, ADAMTS17, AEBP1, COL11A1, EFEMP1, LTBP1, MUC13, TGFB3</i> |
| Genes encoding structural ECM glycoproteins                                                                               | 2.89           | 0.0035         | 0.0047     | 3                                 | <i>AEBP1, EFEMP1, LTBP1</i>                                            |
| Ensemble of genes encoding ECM-associated proteins including ECM-affiliated proteins, ECM regulators and secreted factors | 0.962          | 0.1            | 0.1        | 4                                 | <i>ADAMTS10, ADAMTS17, MUC13, TGFB3</i>                                |

**Supplementary Table 5. Summary-based Mendelian Randomisation (SMR) using eQTL data from GTEx v6 transformed fibroblasts.** Columns are: Probe ID, probe chromosome, gene name, SNP name, effect allele, non-effect allele, frequency of the effect allele, GWAS p-value, eQTL p-value, SMR p-value and HEIDI p-value (see Methods). The two probes (genes) that met the Bonferroni-corrected significance threshold are shown.

| Probe ID           | Chr | Gene          | Top SNP    | A1 | A2 | Freq     | P <sub>GWAS</sub>     | P <sub>eQTL</sub>      | P <sub>SMR</sub>      | P <sub>HEIDI</sub> |
|--------------------|-----|---------------|------------|----|----|----------|-----------------------|------------------------|-----------------------|--------------------|
| ENSG00000049323.11 | 2   | <i>LTBP1</i>  | rs7571401  | C  | G  | 0.555473 | 8.10×10 <sup>-7</sup> | 2.30×10 <sup>-47</sup> | 3.03×10 <sup>-6</sup> | 0.530              |
| ENSG00000140400.10 | 15  | <i>MAN2C1</i> | rs10220738 | T  | A  | 0.747759 | 2.20×10 <sup>-6</sup> | 6.48×10 <sup>-63</sup> | 5.25×10 <sup>-6</sup> | 0.968              |

**Supplementary Table 6. Partitioned CTS heritability across different cell and tissue types.** This analysis was implemented using LDSC-SEG across 205 different tissue and cell types from GTEx and Franke Lab gene expression datasets. The cell and tissue types with coefficient p-value<0.05 are shown (with regression coefficients and standard errors). Additionally, the cell and tissue types have been classified into nine distinct tissue categories, as per Finucane et al.

| Name                                                | Coefficient           | Coefficient SE         | Coefficient P-value | Tissue category            |
|-----------------------------------------------------|-----------------------|------------------------|---------------------|----------------------------|
| A11.329.629.Osteoblasts                             | $2.72 \times 10^{-9}$ | $8.32 \times 10^{-10}$ | 0.000544043         | Musculoskeletal/Connective |
| A11.620.520.Myocytes..Smooth.Muscle                 | $2.14 \times 10^{-9}$ | $7.76 \times 10^{-10}$ | 0.002915213         | Musculoskeletal/Connective |
| A11.872.190.260.Embryoid.Bodies                     | $2.56 \times 10^{-9}$ | $9.31 \times 10^{-10}$ | 0.002963495         | Other                      |
| A10.165.114.830.750.Subcutaneous.Fat                | $1.56 \times 10^{-9}$ | $6.24 \times 10^{-10}$ | 0.006340782         | Adipose                    |
| A10.165.450.300.Cicatrix                            | $1.55 \times 10^{-9}$ | $6.27 \times 10^{-10}$ | 0.006780791         | Musculoskeletal/Connective |
| Artery_Tibial                                       | $1.42 \times 10^{-9}$ | $6.11 \times 10^{-10}$ | 0.010118058         | Cardiovascular             |
| A11.329.171.Chondrocytes                            | $1.94 \times 10^{-9}$ | $8.39 \times 10^{-10}$ | 0.010502383         | Musculoskeletal/Connective |
| Artery_Aorta                                        | $1.45 \times 10^{-9}$ | $6.38 \times 10^{-10}$ | 0.011613989         | Cardiovascular             |
| A02.165.Cartilage                                   | $1.80 \times 10^{-9}$ | $8.19 \times 10^{-10}$ | 0.013885044         | Musculoskeletal/Connective |
| A05.360.319.679.690.Myometrium                      | $1.52 \times 10^{-9}$ | $6.93 \times 10^{-10}$ | 0.014279534         | Musculoskeletal/Connective |
| A08.186.211.653.Mesencephalon                       | $1.45 \times 10^{-9}$ | $6.88 \times 10^{-10}$ | 0.017696367         | CNS                        |
| A10.690.467.Muscle..Smooth                          | $1.46 \times 10^{-9}$ | $7.48 \times 10^{-10}$ | 0.025717943         | Musculoskeletal/Connective |
| A11.872.580.Mesenchymal.Stem.Cells                  | $1.37 \times 10^{-9}$ | $7.37 \times 10^{-10}$ | 0.031147321         | Other                      |
| A11.118.637.555.567.562.B.Lymphocytes               | $1.52 \times 10^{-9}$ | $8.26 \times 10^{-10}$ | 0.032722413         | Blood/Immune               |
| A10.165.450.300.425.Keloid                          | $1.10 \times 10^{-9}$ | $6.08 \times 10^{-10}$ | 0.034930974         | Musculoskeletal/Connective |
| Adipose_Subcutaneous                                | $1.14 \times 10^{-9}$ | $6.46 \times 10^{-10}$ | 0.039305727         | Adipose                    |
| A10.165.114.830.500.750.Subcutaneous.Fat..Abdominal | $1.12 \times 10^{-9}$ | $6.36 \times 10^{-10}$ | 0.039818441         | Adipose                    |
| A10.615.789.Serous.Membrane                         | $1.42 \times 10^{-9}$ | $8.26 \times 10^{-10}$ | 0.042352467         | Other                      |
| A03.556.500.760.464.Parotid.Gland                   | $1.21 \times 10^{-9}$ | $7.33 \times 10^{-10}$ | 0.049218223         | Digestive                  |



**Supplementary Table 7. Genetic correlation between CTS and other phenotypes.** The analysis was performed using LD score (LDSC) regression, implemented in LD Hub. The traits are shown along with the PMID of the study from which the LDSC data were derived, the trait category, and the correlation coefficient ( $r_g$ ). Traits are ranked by p-value, and the top 14 traits meet a Bonferroni-corrected significant threshold of  $p < 0.0014$ .

| Trait 1 | Trait 2                                                        | PMID     | Category       | $r_g$   | se     | z       | p        | $h^2_{obs}$ | $h^2_{obs\_se}$ | $h^2_{int}$ | $h^2_{int\_se}$ | $gcov_{int}$ | $gcov_{int\_se}$ |
|---------|----------------------------------------------------------------|----------|----------------|---------|--------|---------|----------|-------------|-----------------|-------------|-----------------|--------------|------------------|
| CTS     | Body mass index                                                | 20935630 | anthropometric | 0.3464  | 0.0351 | 9.8663  | 5.83E-23 | 0.1906      | 0.0095          | 1.0089      | 0.0106          | -0.0078      | 0.0061           |
| CTS     | Overweight                                                     | 23563607 | anthropometric | 0.3613  | 0.0376 | 9.6148  | 6.92E-22 | 0.1099      | 0.0065          | 1.0235      | 0.0096          | -0.0074      | 0.0059           |
| CTS     | Obesity class 1                                                | 23563607 | anthropometric | 0.3268  | 0.0382 | 8.5645  | 1.09E-17 | 0.2179      | 0.0118          | 1.0168      | 0.0111          | -0.0003      | 0.0068           |
| CTS     | Waist-to-hip ratio                                             | 25673412 | anthropometric | 0.2465  | 0.035  | 7.0465  | 1.83E-12 | 0.1135      | 0.007           | 0.9197      | 0.0092          | -0.0051      | 0.0055           |
| CTS     | Obesity class 2                                                | 23563607 | anthropometric | 0.3176  | 0.0482 | 6.5887  | 4.44E-11 | 0.1856      | 0.0127          | 1.0004      | 0.01            | 0.0013       | 0.0067           |
| CTS     | Height_2010                                                    | 20881960 | anthropometric | -0.2168 | 0.0368 | -5.8985 | 3.67E-09 | 0.2859      | 0.0167          | 1.0176      | 0.019           | -0.0047      | 0.0071           |
| CTS     | Waist circumference                                            | 25673412 | anthropometric | 0.208   | 0.037  | 5.6262  | 1.84E-08 | 0.1215      | 0.0052          | 0.8444      | 0.0079          | -0.0016      | 0.0054           |
| CTS     | Extreme bmi                                                    | 23563607 | anthropometric | 0.2726  | 0.0548 | 4.9694  | 6.72E-07 | 0.7009      | 0.0541          | 1.0271      | 0.0113          | 0.0006       | 0.0075           |
| CTS     | Extreme height                                                 | 23563607 | anthropometric | -0.2235 | 0.0472 | -4.7405 | 2.13E-06 | 1.2395      | 0.1072          | 1.034       | 0.0177          | -0.0008      | 0.0091           |
| CTS     | Obesity class 3                                                | 23563607 | anthropometric | 0.2928  | 0.0681 | 4.3022  | 1.69E-05 | 0.1213      | 0.0144          | 0.9802      | 0.0093          | 0.0031       | 0.0065           |
| CTS     | HbA1C                                                          | 20858683 | glycemic       | 0.2824  | 0.0711 | 3.9739  | 7.07E-05 | 0.0655      | 0.0121          | 0.9988      | 0.0073          | -0.0036      | 0.0049           |
| CTS     | Lumbar spine bone mineral density                              | 22504420 | bone           | 0.1826  | 0.0483 | 3.7848  | 0.0002   | 0.2669      | 0.0249          | 1.0155      | 0.0085          | -0.0083      | 0.0053           |
| CTS     | Childhood obesity                                              | 22484627 | anthropometric | 0.2054  | 0.0575 | 3.5712  | 0.0004   | 0.418       | 0.0451          | 0.9251      | 0.0078          | 0.0069       | 0.005            |
| CTS     | Hip circumference                                              | 25673412 | anthropometric | 0.1235  | 0.037  | 3.3331  | 0.0009   | 0.1277      | 0.0059          | 0.86        | 0.0081          | -0.0004      | 0.0054           |
| CTS     | Lumbar Spine bone mineral density                              | 26367794 | bone           | 0.156   | 0.0498 | 3.1304  | 0.0017   | 0.1278      | 0.0152          | 0.9806      | 0.0082          | -0.0004      | 0.0046           |
| CTS     | Child birth weight                                             | 23202124 | anthropometric | -0.2127 | 0.0694 | -3.0639 | 0.0022   | 0.1114      | 0.0185          | 1.005       | 0.0061          | 0.003        | 0.0048           |
| CTS     | Fasting glucose main effect                                    | 22581228 | glycemic       | 0.1493  | 0.0522 | 2.8595  | 0.0042   | 0.0968      | 0.0191          | 1           | 0.0099          | -0.0016      | 0.0047           |
| CTS     | Difference in height between adolescence and adulthood; age 14 | 23449627 | anthropometric | -0.2452 | 0.0943 | -2.5995 | 0.0093   | 0.441       | 0.1077          | 0.9823      | 0.0067          | 0.0053       | 0.0053           |
| CTS     | Rheumatoid Arthritis                                           | 24390342 | autoimmune     | 0.1132  | 0.0439 | 2.582   | 0.0098   | 0.1598      | 0.0293          | 1.0238      | 0.017           | 0.0039       | 0.0052           |
| CTS     | Type 2 Diabetes                                                | 22885922 | glycemic       | 0.1407  | 0.0556 | 2.53    | 0.0114   | 0.0887      | 0.0094          | 1.0072      | 0.0072          | 0.0016       | 0.0051           |
| CTS     | Difference in height between childhood and adulthood; age 8    | 23449627 | anthropometric | -0.169  | 0.0709 | -2.3835 | 0.0172   | 0.3417      | 0.0515          | 0.9704      | 0.0077          | -0.0057      | 0.0056           |
| CTS     | Birth weight                                                   | 27680694 | anthropometric | -0.0997 | 0.0422 | -2.3632 | 0.0181   | 0.103       | 0.0068          | 1.0408      | 0.0101          | -0.0035      | 0.0053           |
| CTS     | Child birth length                                             | 25281659 | anthropometric | -0.1402 | 0.0727 | -1.9288 | 0.0538   | 0.1696      | 0.0231          | 0.9926      | 0.0071          | -0.0008      | 0.0059           |

|            |                                               |          |                |         |        |         |        |        |        |        |        |         |        |
|------------|-----------------------------------------------|----------|----------------|---------|--------|---------|--------|--------|--------|--------|--------|---------|--------|
| <b>CTS</b> | Serum Urate overweight                        | 25811787 | uric_acid      | -0.0988 | 0.0539 | -1.8344 | 0.0666 | 0.5161 | 0.2982 | 0.9708 | 0.0268 | 0.0033  | 0.0051 |
| <b>CTS</b> | Femoral Neck bone mineral density             | 26367794 | bone           | 0.0966  | 0.0536 | 1.8024  | 0.0715 | 0.1241 | 0.0147 | 0.9772 | 0.0082 | 0.0001  | 0.0047 |
| <b>CTS</b> | Fasting insulin main effect                   | 22581228 | glycemic       | 0.1117  | 0.0669 | 1.6691  | 0.0951 | 0.0707 | 0.0103 | 1.015  | 0.0073 | 0.0002  | 0.0053 |
| <b>CTS</b> | Height; Females at age 10 and males at age 12 | 23449627 | anthropometric | -0.0849 | 0.0561 | -1.513  | 0.1303 | 0.429  | 0.0482 | 0.9529 | 0.008  | -0.0024 | 0.0056 |
| <b>CTS</b> | Femoral neck bone mineral density             | 22504420 | bone           | 0.0624  | 0.0454 | 1.3744  | 0.1693 | 0.3067 | 0.0258 | 0.9784 | 0.0085 | 0.0063  | 0.0049 |
| <b>CTS</b> | Fasting proinsulin                            | 20081858 | glycemic       | 0.1263  | 0.0938 | 1.3474  | 0.1779 | 0.1808 | 0.0894 | 0.9827 | 0.0097 | -0.0081 | 0.0052 |
| <b>CTS</b> | Extreme waist-to-hip ratio                    | 23563607 | anthropometric | 0.1121  | 0.089  | 1.2601  | 0.2076 | 0.3617 | 0.0585 | 0.9769 | 0.0086 | 0.0047  | 0.0069 |
| <b>CTS</b> | Forearm Bone mineral density                  | 26367794 | bone           | 0.171   | 0.1389 | 1.2306  | 0.2185 | 0.0874 | 0.0446 | 1.0118 | 0.007  | -0.0007 | 0.0051 |
| <b>CTS</b> | Infant head circumference                     | 22504419 | anthropometric | -0.0945 | 0.0799 | -1.1829 | 0.2368 | 0.2282 | 0.0443 | 0.9908 | 0.0068 | 0.0003  | 0.0052 |
| <b>CTS</b> | HOMA-IR                                       | 20081858 | glycemic       | 0.0869  | 0.0807 | 1.0769  | 0.2815 | 0.0694 | 0.0127 | 1.0025 | 0.0066 | 0.004   | 0.0053 |
| <b>CTS</b> | Sitting height ratio                          | 25865494 | anthropometric | -0.064  | 0.0609 | -1.0507 | 0.2934 | 0.2203 | 0.0283 | 0.9802 | 0.0076 | 0.0072  | 0.0054 |
| <b>CTS</b> | 2hr glucose adjusted for BMI                  | 20081857 | glycemic       | -0.0732 | 0.1064 | -0.688  | 0.4915 | 0.103  | 0.0345 | 0.9932 | 0.0071 | 0.0016  | 0.0054 |
| <b>CTS</b> | HOMA-B                                        | 20081858 | glycemic       | 0.0051  | 0.0704 | 0.0718  | 0.9428 | 0.0887 | 0.014  | 0.9904 | 0.0066 | 0.0031  | 0.0054 |

**Supplementary Table 8. Gene expression of *COL11A1* and *EFEMP1* in tibial nerve and transformed fibroblasts**

| <b>Gene</b>    | <b>Expression in tibial nerve<sup>a</sup></b> | <b>Rank (tibial nerve)<sup>b</sup></b> | <b>Expression in transformed fibroblasts<sup>a</sup></b> | <b>Rank (transformed fibroblasts)<sup>b</sup></b> |
|----------------|-----------------------------------------------|----------------------------------------|----------------------------------------------------------|---------------------------------------------------|
| <i>COL11A1</i> | 8.727                                         | 3                                      | 32.24                                                    | 1                                                 |
| <i>EFEMP1</i>  | 129.05                                        | 13                                     | 451.2                                                    | 4                                                 |

<sup>a</sup>Exon expression for each candidate gene, measured in transcripts per million (TPM). Data Source: GTEx Analysis Release v7 (dbGaP Accession phs000424.v7.p2).

<sup>b</sup>Rank of exon expression quantity (in TPM) for tibial nerve and transformed fibroblasts, out of 53 tissue types represented in GTEx v7.

**Supplementary Table 9. eQTLs for functional SNPs at 2p16.1 (*EFEMP1* locus)**

| SNP <sup>a</sup>  | Gene          | p-value               | Normalised Effect Size <sup>b</sup> | Tissue                              | r <sup>2</sup> with rs3791679 <sup>c</sup> |
|-------------------|---------------|-----------------------|-------------------------------------|-------------------------------------|--------------------------------------------|
| <b>rs3791679</b>  | <i>EFEMP1</i> | 2.0×10 <sup>-13</sup> | 0.32                                | Thyroid                             | 1                                          |
|                   | <i>EFEMP1</i> | 1.5×10 <sup>-6</sup>  | 0.25                                | Skin – Not Sun Exposed (Suprapubic) |                                            |
|                   | <i>CLHCI</i>  | 4.4×10 <sup>-5</sup>  | 0.29                                | Whole Blood                         |                                            |
|                   | <i>EFEMP1</i> | 6.1×10 <sup>-5</sup>  | 0.19                                | Skin – Sun Exposed (Lower leg)      |                                            |
| <b>rs6752931</b>  | <i>EFEMP1</i> | 1.1×10 <sup>-16</sup> | 0.34                                | Thyroid                             | 0.76                                       |
| <b>rs4146922</b>  | <i>EFEMP1</i> | 7.2×10 <sup>-16</sup> | 0.35                                | Thyroid                             | 0.82                                       |
|                   | <i>CLHCI</i>  | 1.1×10 <sup>-5</sup>  | 0.32                                | Whole Blood                         |                                            |
|                   | <i>RPS27A</i> | 2.2×10 <sup>-5</sup>  | -0.21                               | Colon - Sigmoid                     |                                            |
| <b>rs58680090</b> | <i>EFEMP1</i> | 1.3×10 <sup>-16</sup> | 0.36                                | Thyroid                             | 0.86                                       |
|                   | <i>CLHCI</i>  | 2.6×10 <sup>-5</sup>  | 0.31                                | Whole Blood                         |                                            |
|                   | <i>RPS27A</i> | 3.7×10 <sup>-5</sup>  | -0.21                               | Colon - Sigmoid                     |                                            |
| <b>rs1344732</b>  | <i>EFEMP1</i> | 3.1×10 <sup>-13</sup> | 0.28                                | Thyroid                             | 0.67                                       |
| <b>rs7563032</b>  | <i>EFEMP1</i> | 1.1×10 <sup>-15</sup> | 0.35                                | Thyroid                             | 0.83                                       |
|                   | <i>CLHCI</i>  | 2.2×10 <sup>-5</sup>  | 0.31                                | Whole Blood                         |                                            |
|                   | <i>RPS27A</i> | 3.3×10 <sup>-5</sup>  | -0.21                               | Colon - Sigmoid                     |                                            |
| <b>rs6739641</b>  | <i>EFEMP1</i> | 4.0×10 <sup>-13</sup> | 0.28                                | Thyroid                             | 0.67                                       |
|                   | <i>CLHCI</i>  | 4.5×10 <sup>-5</sup>  | 0.26                                | Whole Blood                         |                                            |

Notes: eQTLs were obtained from GTEx v7.

<sup>a</sup>The lead SNP at this locus is rs3791679. The remaining SNPs were chosen on the basis of being both genome-wide significant in the CTS GWAS and having likely functional consequences (i.e. CADD score > 12.37 or RegulomeDB score of 2b or more).

<sup>b</sup>The normalised effect size of the eQTLs is defined as the slope of the linear regression, and is computed as the effect of the alternative allele relative to the reference allele in the human genome reference GRCh37/hg19.

<sup>c</sup>The LD relationship between rs3791679 and the other SNPs was calculated using 1000 Genomes GBR data.

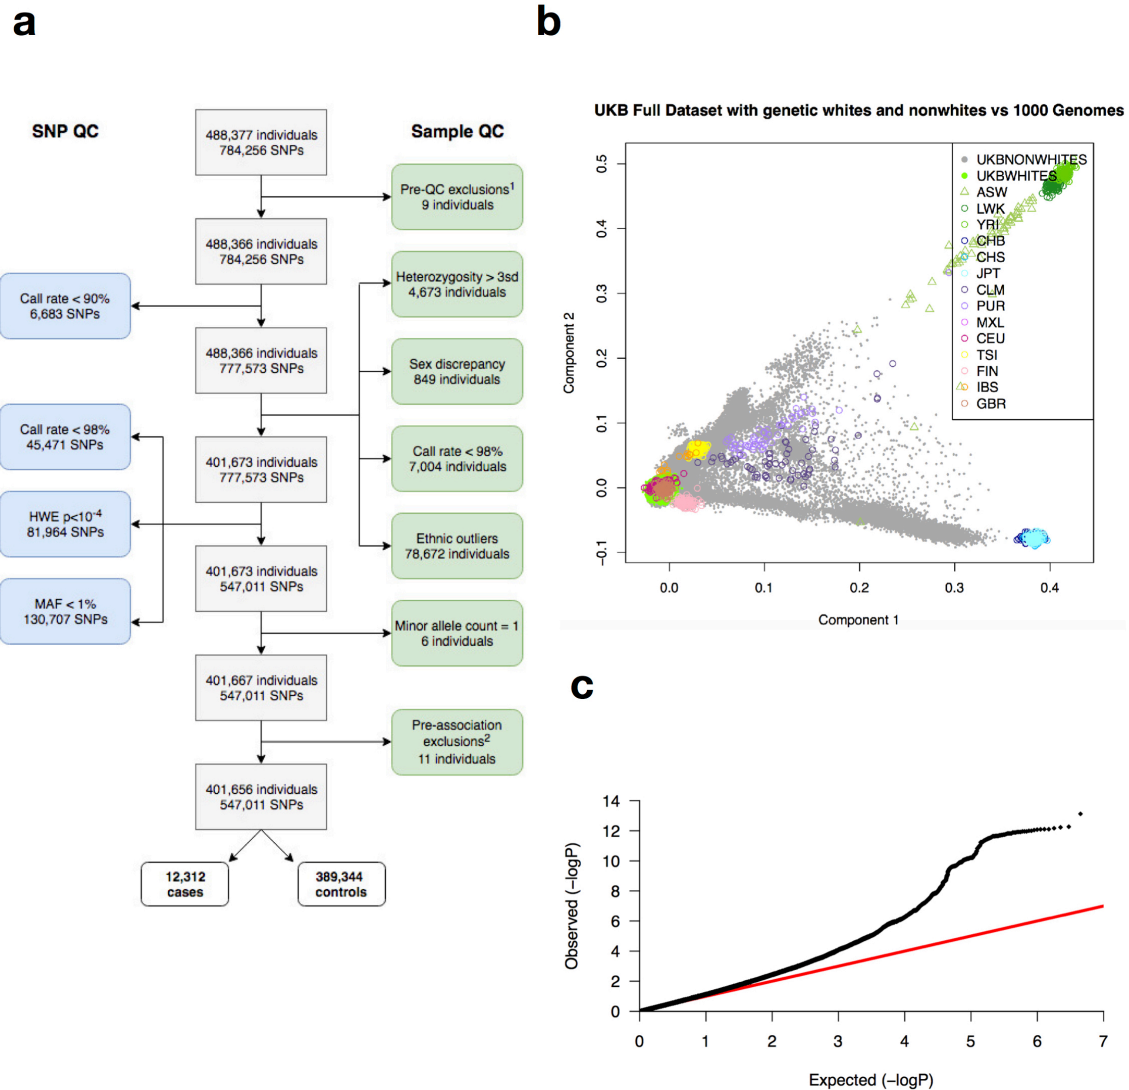

**Supplementary Figure 1. Overview of Quality Control (QC).** **a** Flowchart summarising QC protocol. Excluded SNPs are in blue panels on the left and excluded individuals are in green panels on the right. <sup>1</sup>Pre-QC exclusions: 3 individuals with invalid IDs and sex, and 8 individuals who have withdrawn from UK Biobank were excluded prior to QC. <sup>2</sup>Pre-association exclusions: 11 individuals who were not present in UK Biobank’s sample file accompanying the BGEN files were excluded prior to association. **b** Principal Component Analysis (PCA) for demonstration of ethnicity of UK Biobank individuals. The UK Biobank cohort was merged with publicly available data from the 1000 Genomes Project and PCA was performed using flashpca. Individuals identified by UK Biobank as having white British ancestry are coloured in lime green, and the remaining UK Biobank individuals are in grey. In this graph of principal component 1 vs principal component 2, a near-perfect overlap can be seen between the UK Biobank “white British” individuals and both GBR (British in England and Scotland - light brown) and CEU (Utah residents with Northern and Western European ancestry - magenta) individuals from the 1000 Genomes Project. **c** QQ (quantile-quantile) plot of associated SNPs. The  $\lambda_{GC}$  demonstrated some inflation (1.15), but the LD score regression (LDSC) intercept of 1.015, with an attenuation ratio of 0.073 indicated that the inflation was largely due to polygenicity and the large sample size.

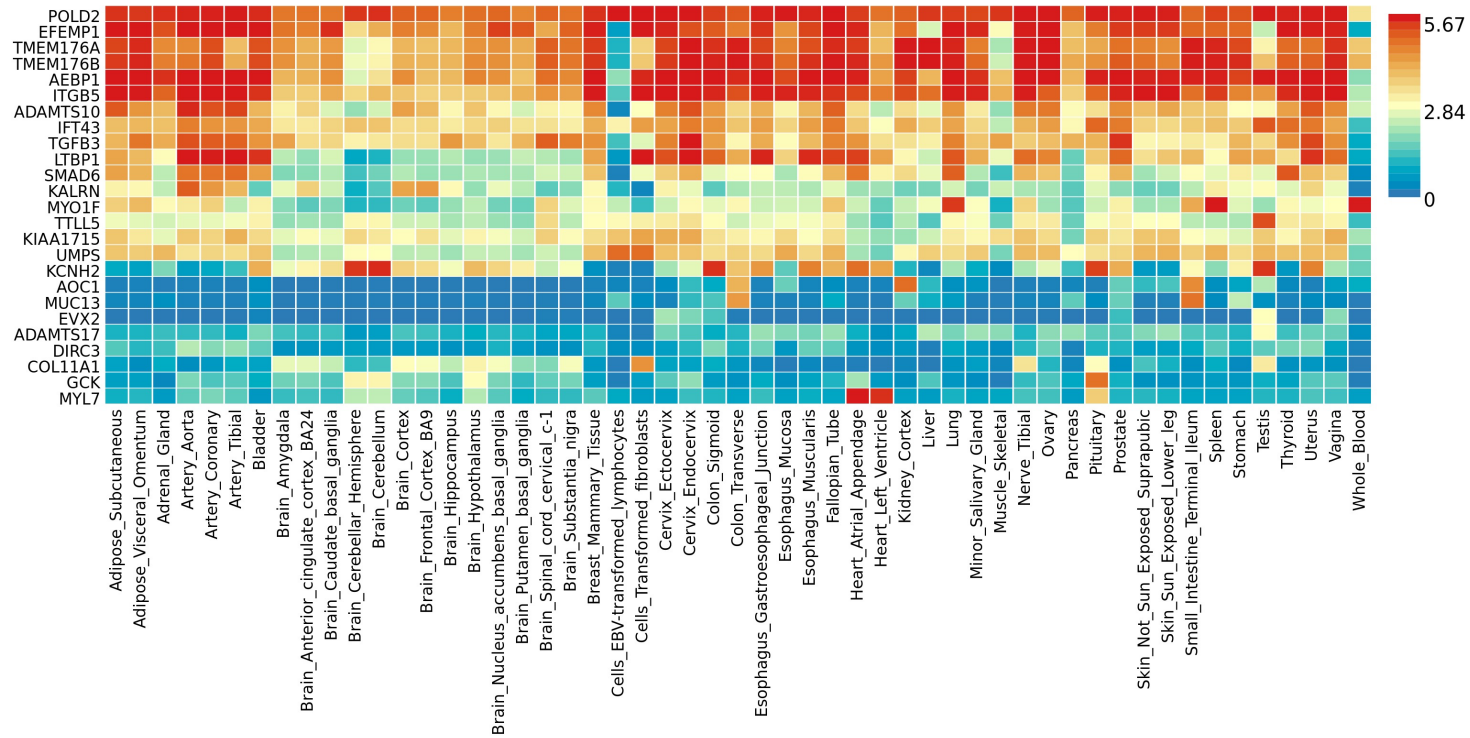

**Supplementary Figure 2. Heat map of gene expression across 53 tissue types.** This analysis was implemented in FUMA, and demonstrates the average expression values of the 25 genes positionally mapped by FUMA, across 53 tissue types in GTEx v7. This is an averaged expression value per tissue type per gene following winsorization at 50 and log 2 transformation with pseudocount 1. The expression value is in Transcripts per Million, and genes have been organised by hierarchical clustering.

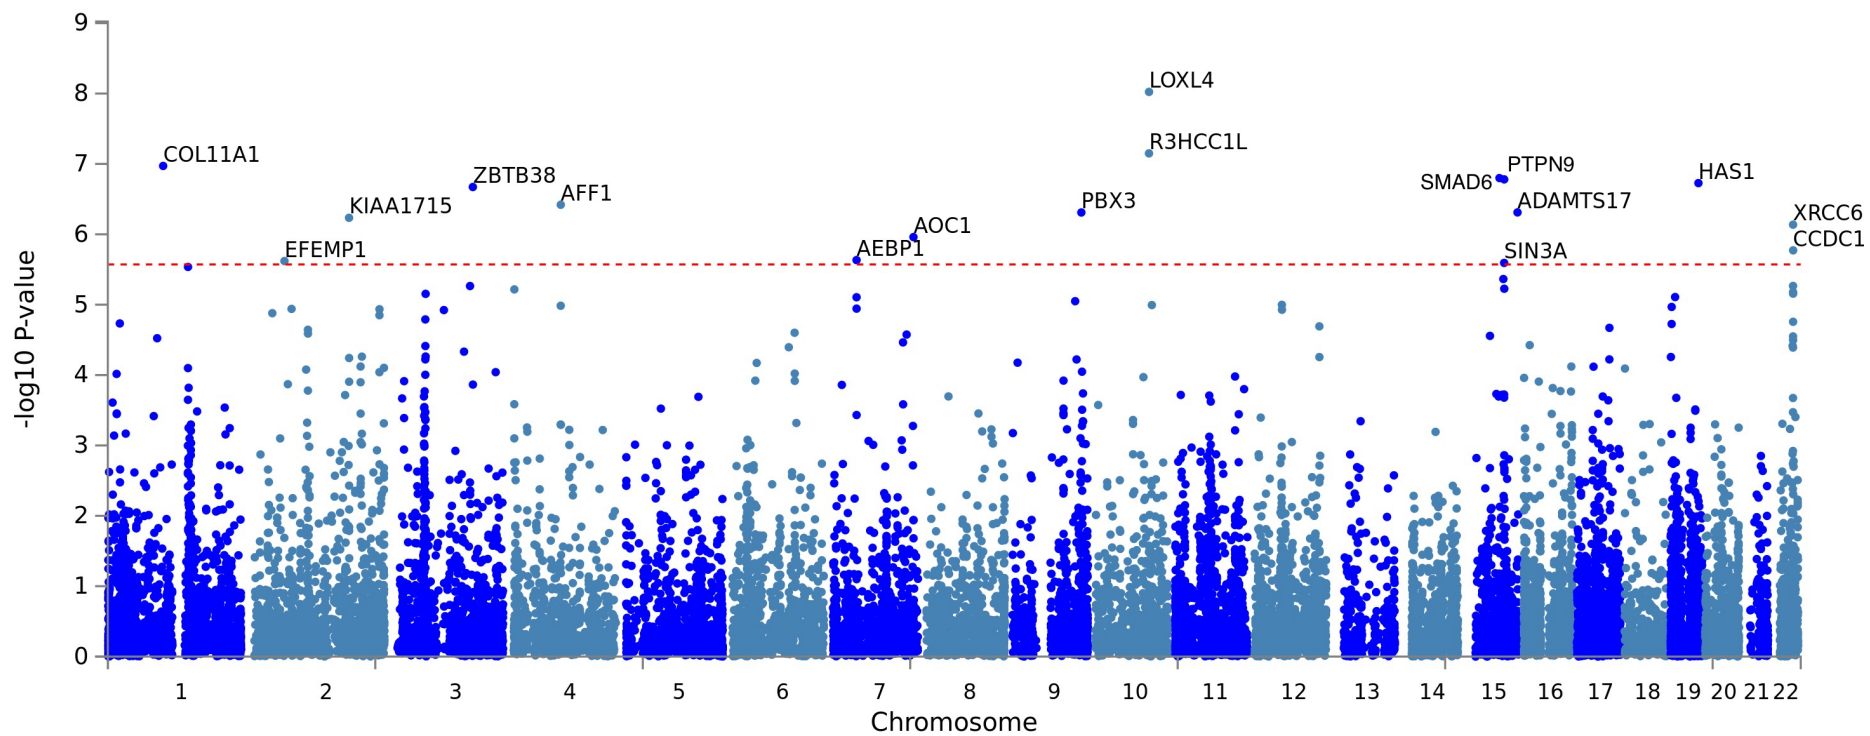

**Supplementary Figure 3. Gene-based association analysis Manhattan plot.** Association results for CTS in MAGMA gene-based association analysis. The dotted red line indicates the threshold for genome-wide significance ( $p < 2.68 \times 10^{-6}$ ). Seventeen genes (labelled) reach genome-wide significance in this analysis. Source data are provided as a Source Data file.

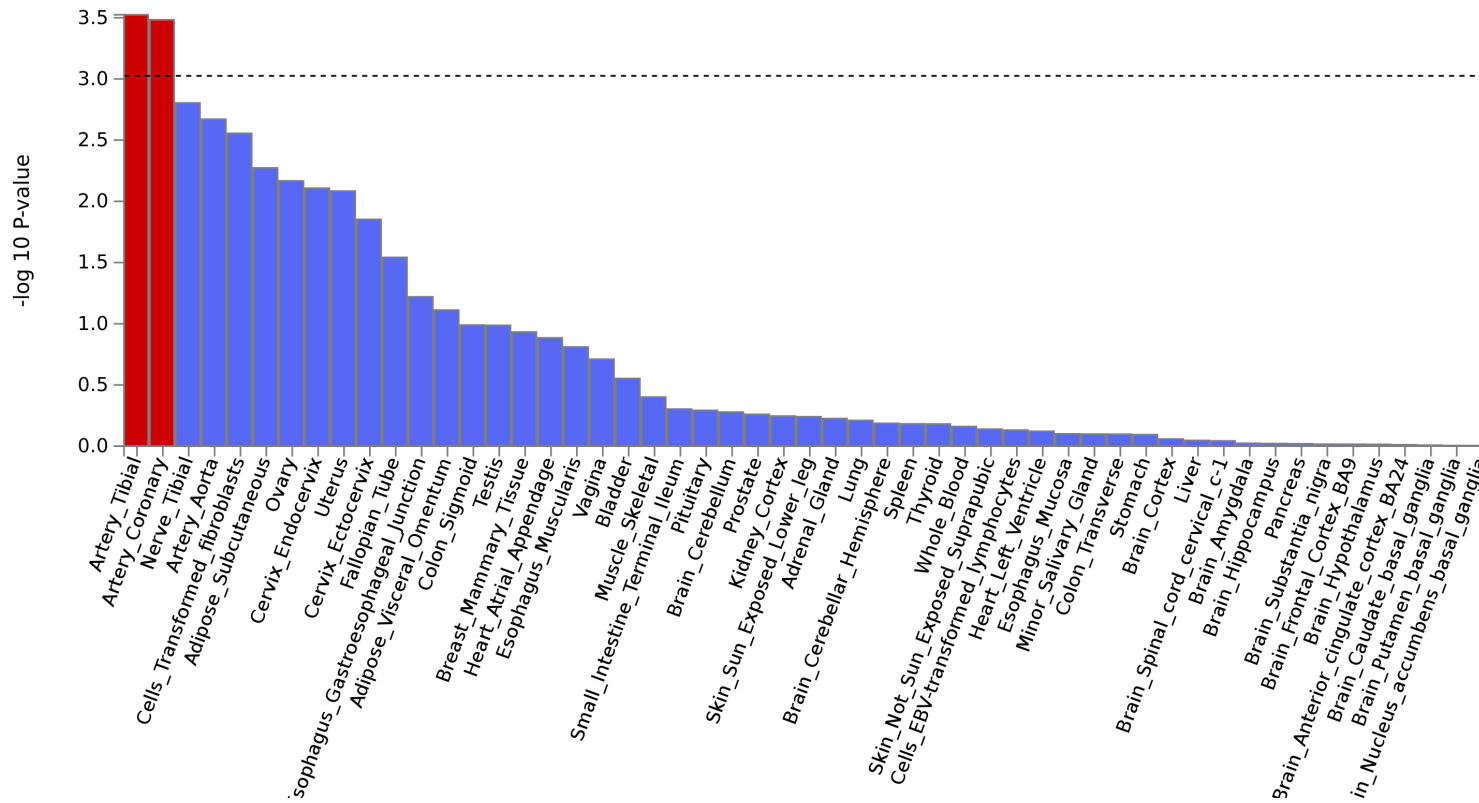

**Supplementary Figure 4. Gene-property analysis in MAGMA.** MAGMA Tissue Expression Analysis of CTS GWAS-summary data, implemented in FUMA. This tests the relationship between highly expressed genes in a specific tissue and the genetic associations from the GWAS. Gene-property analysis is performed using average expression of genes per tissue type as a gene covariate. Gene expression values are log<sub>2</sub> transformed average RPKM (Read Per Kilobase Per Million) per tissue type after winsorization at 50, and are based on GTEx v6 RNA-Seq data across 53 specific tissue types. The dotted line indicates the Bonferroni-corrected  $\alpha$  level, and the tissues that meet this significance threshold are highlighted in red. Source data are provided as a Source Data file.



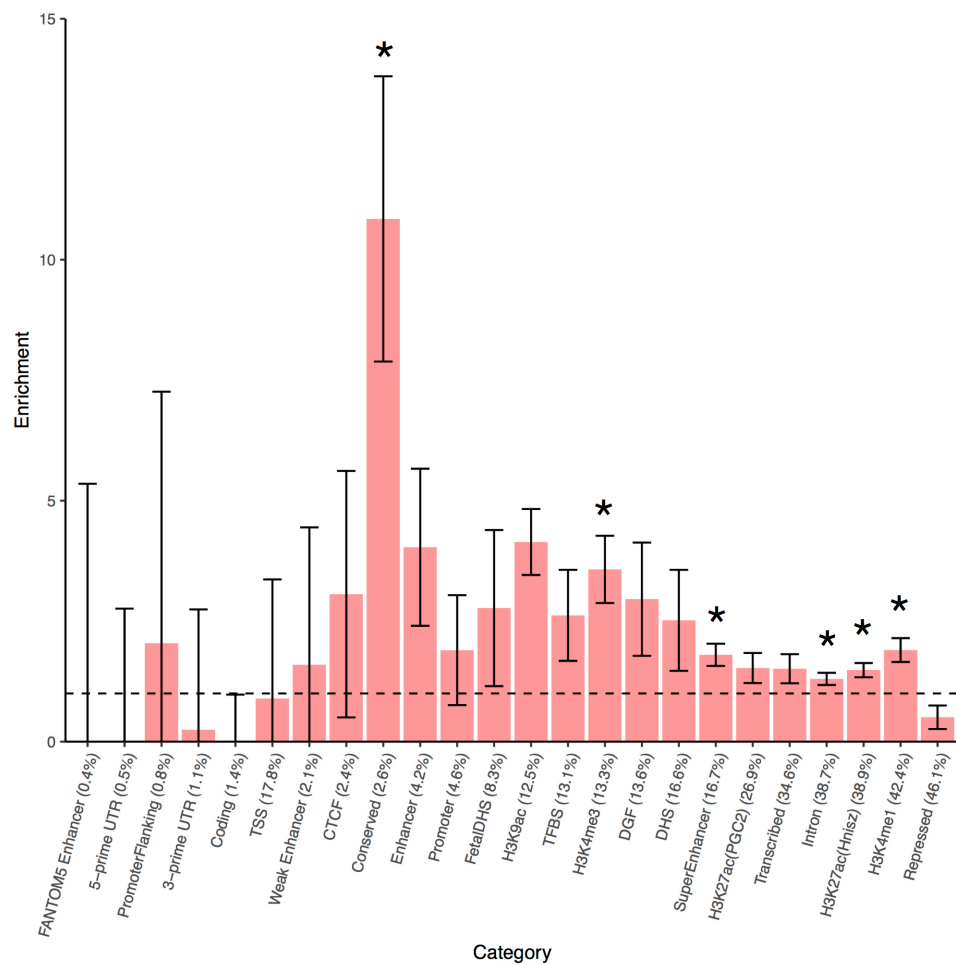

**Supplementary Figure 5. Partitioned CTS heritability across genomic functional categories.** Enrichment estimates across the 24 main functional annotation categories for CTS heritability. The enrichment statistic is the proportion of heritability found in each functional group divided by the proportion of SNPs in each group. The dashed line indicates an enrichment proportion of 1 (i.e. no enrichment). Error bars represent jackknife standard errors around the enrichment estimates, and an asterisk indicates significance at  $p < 0.05$  after Bonferroni correction for the 24 annotations tested. Statistical significance is indicated with an asterisk. Source data are provided as a Source Data file.

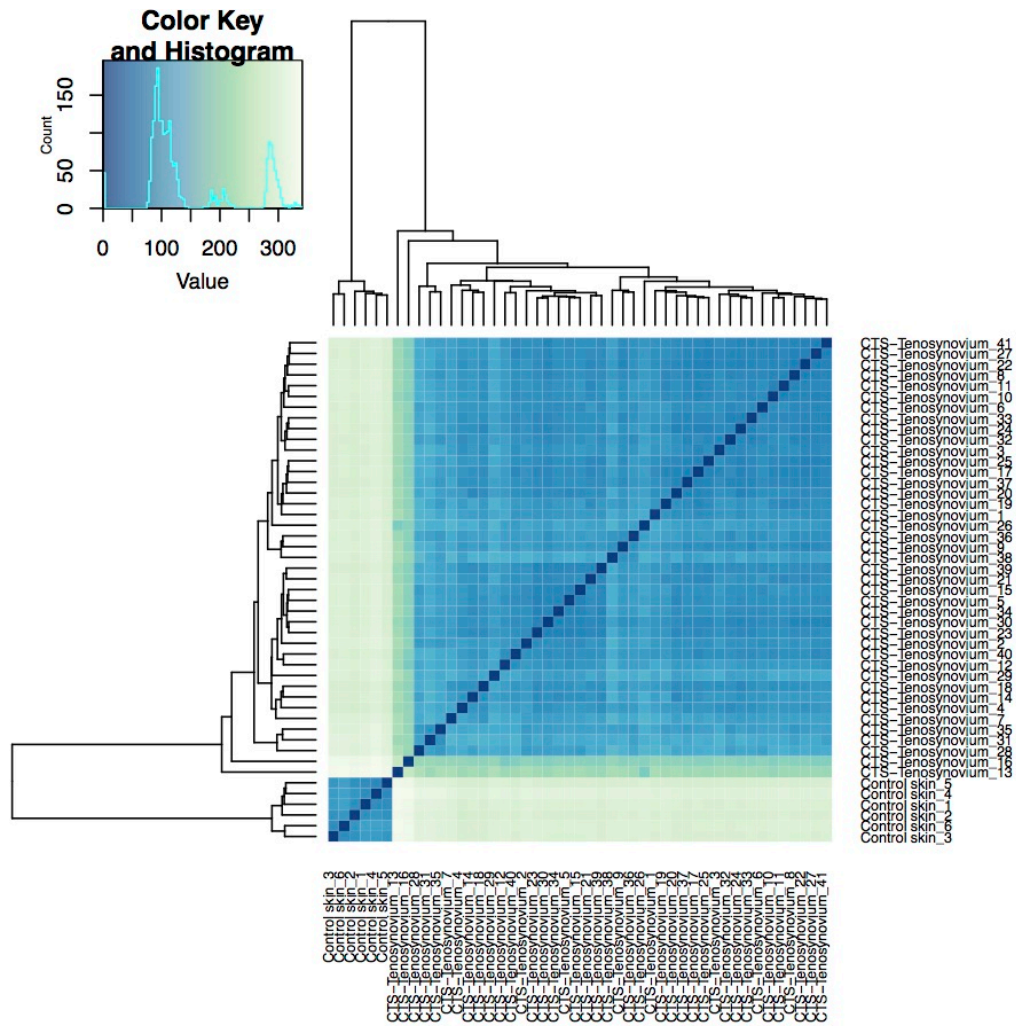

**Supplementary Figure 6. Hierarchical clustering of samples.** Hierarchical clustering of 41 tenosynovium samples from CTS patients and 6 index finger skin samples from healthy individuals, based on regularised log2 counts of Ensembl genes. Euclidean distances were calculated and clustering was carried out using the Ward criterion.

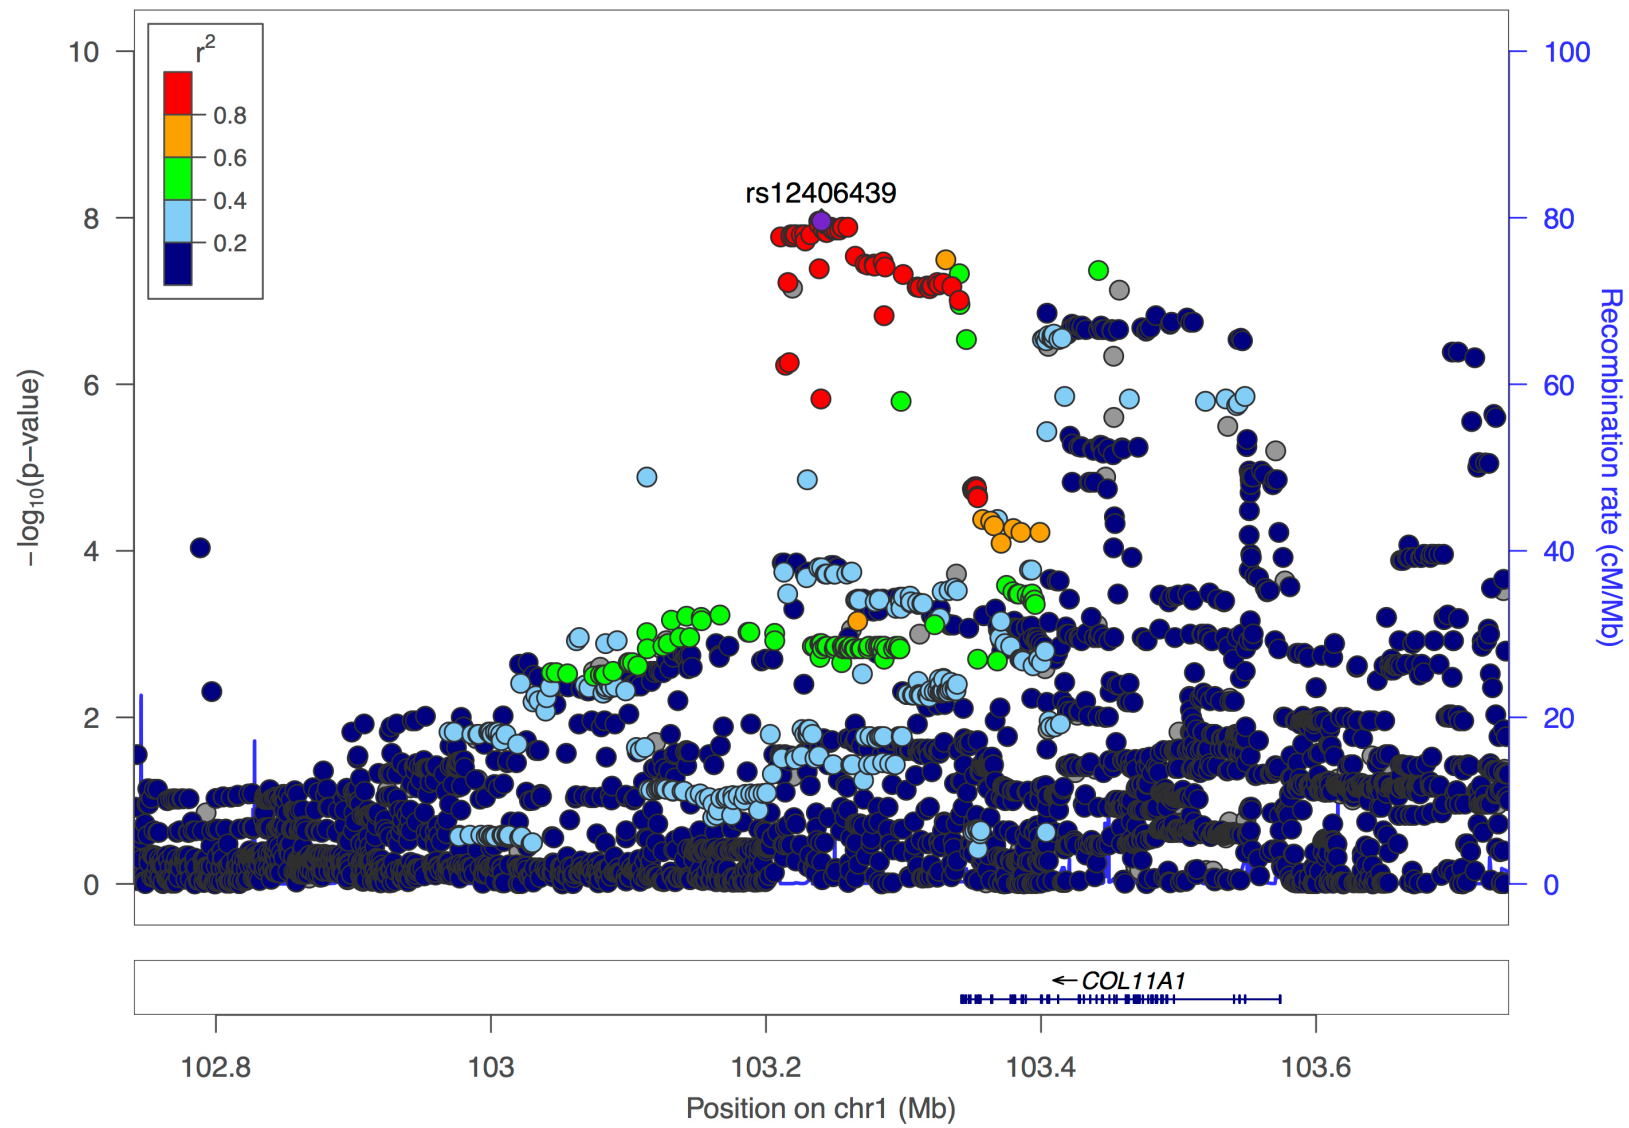

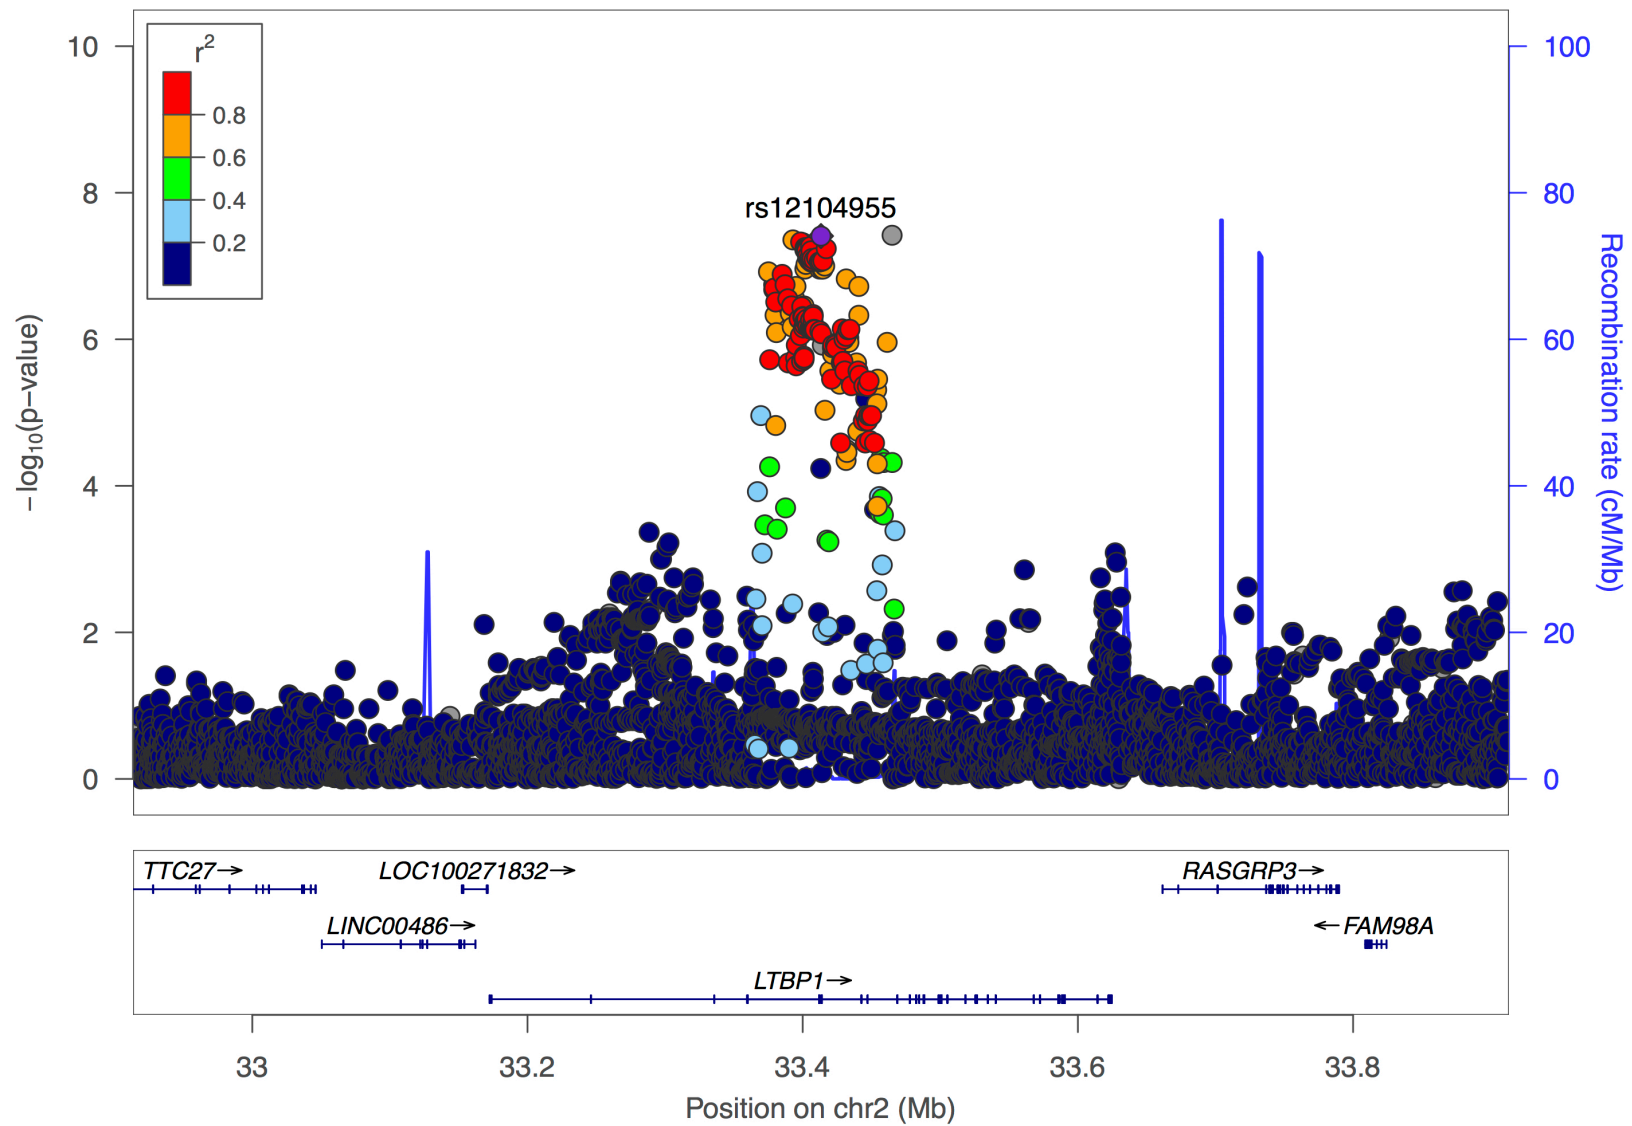

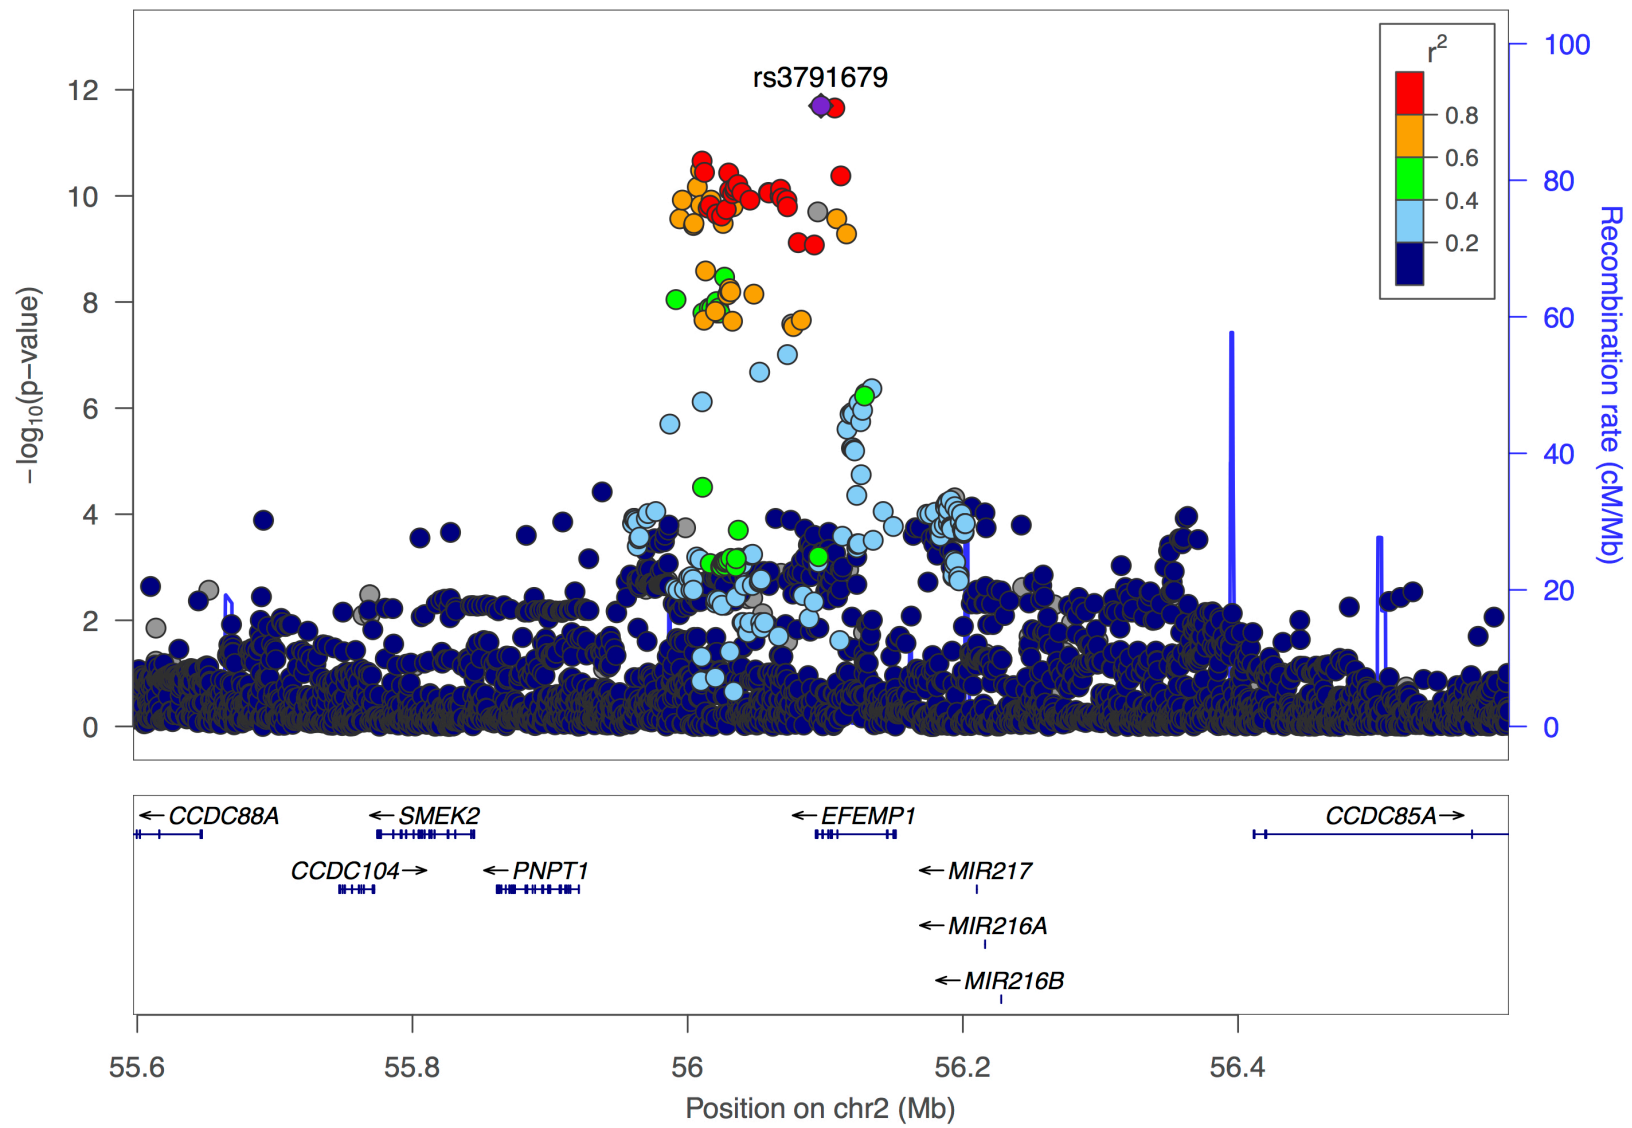

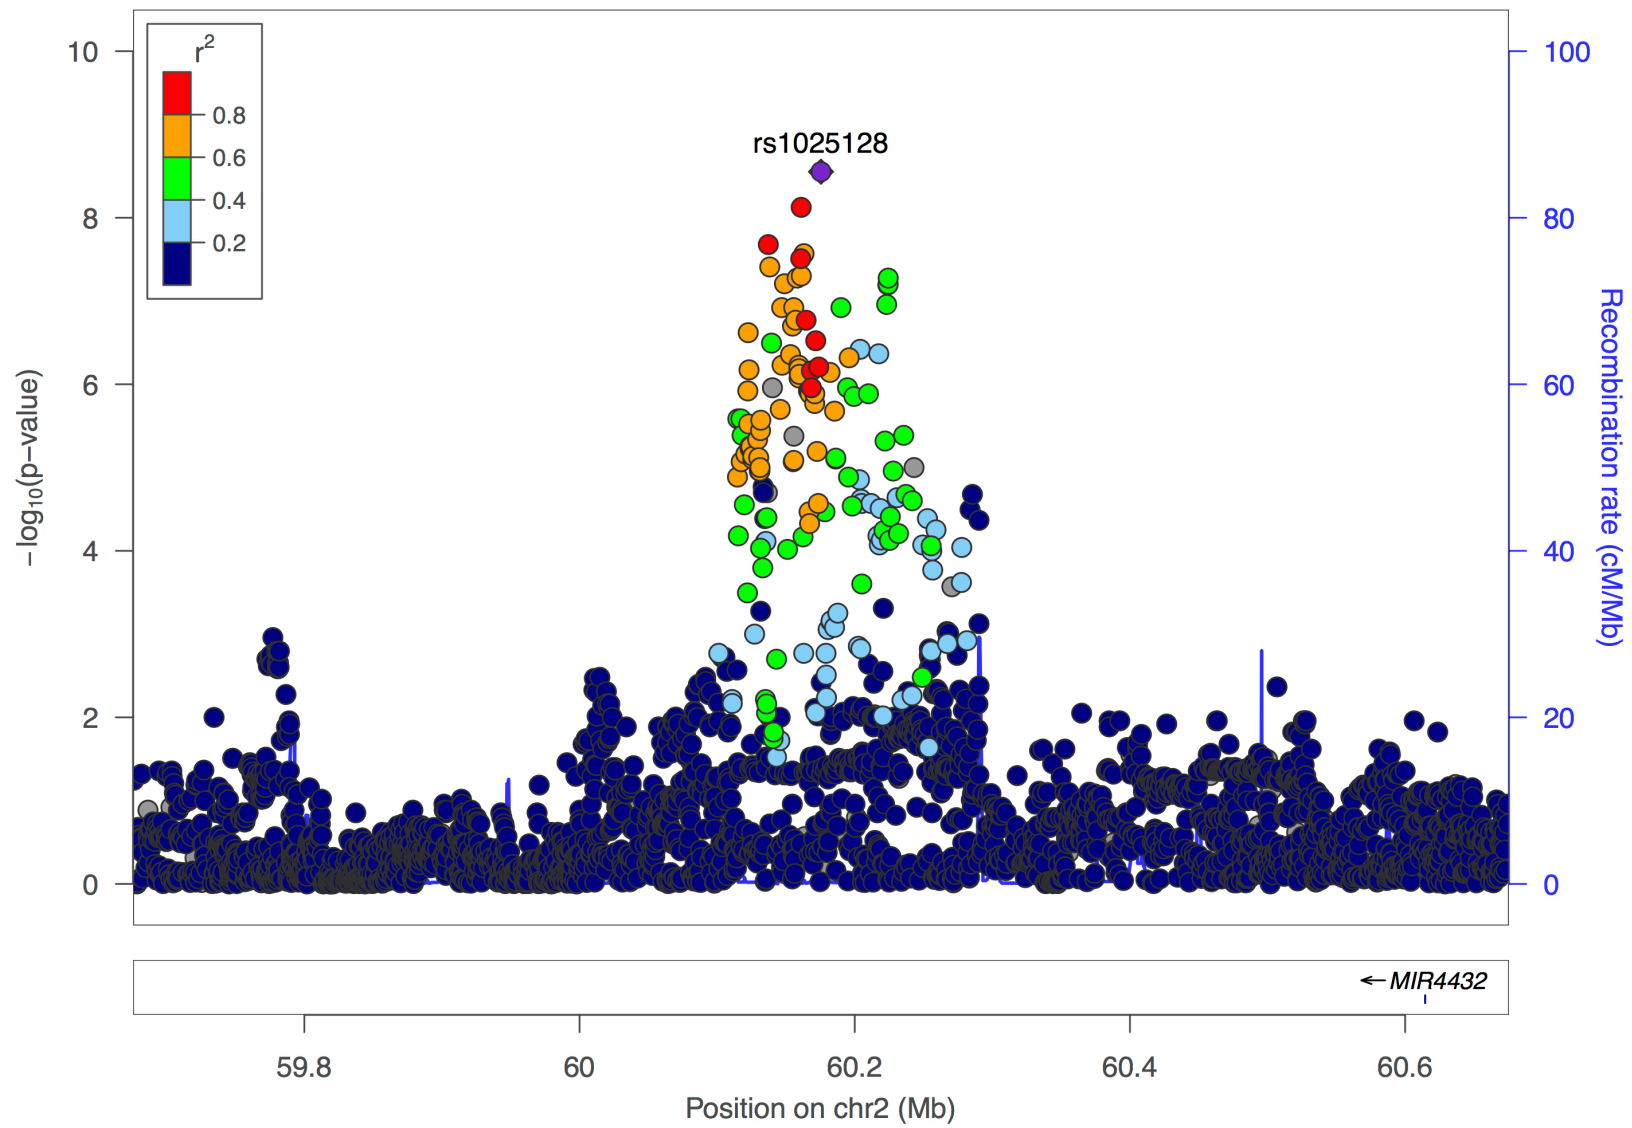

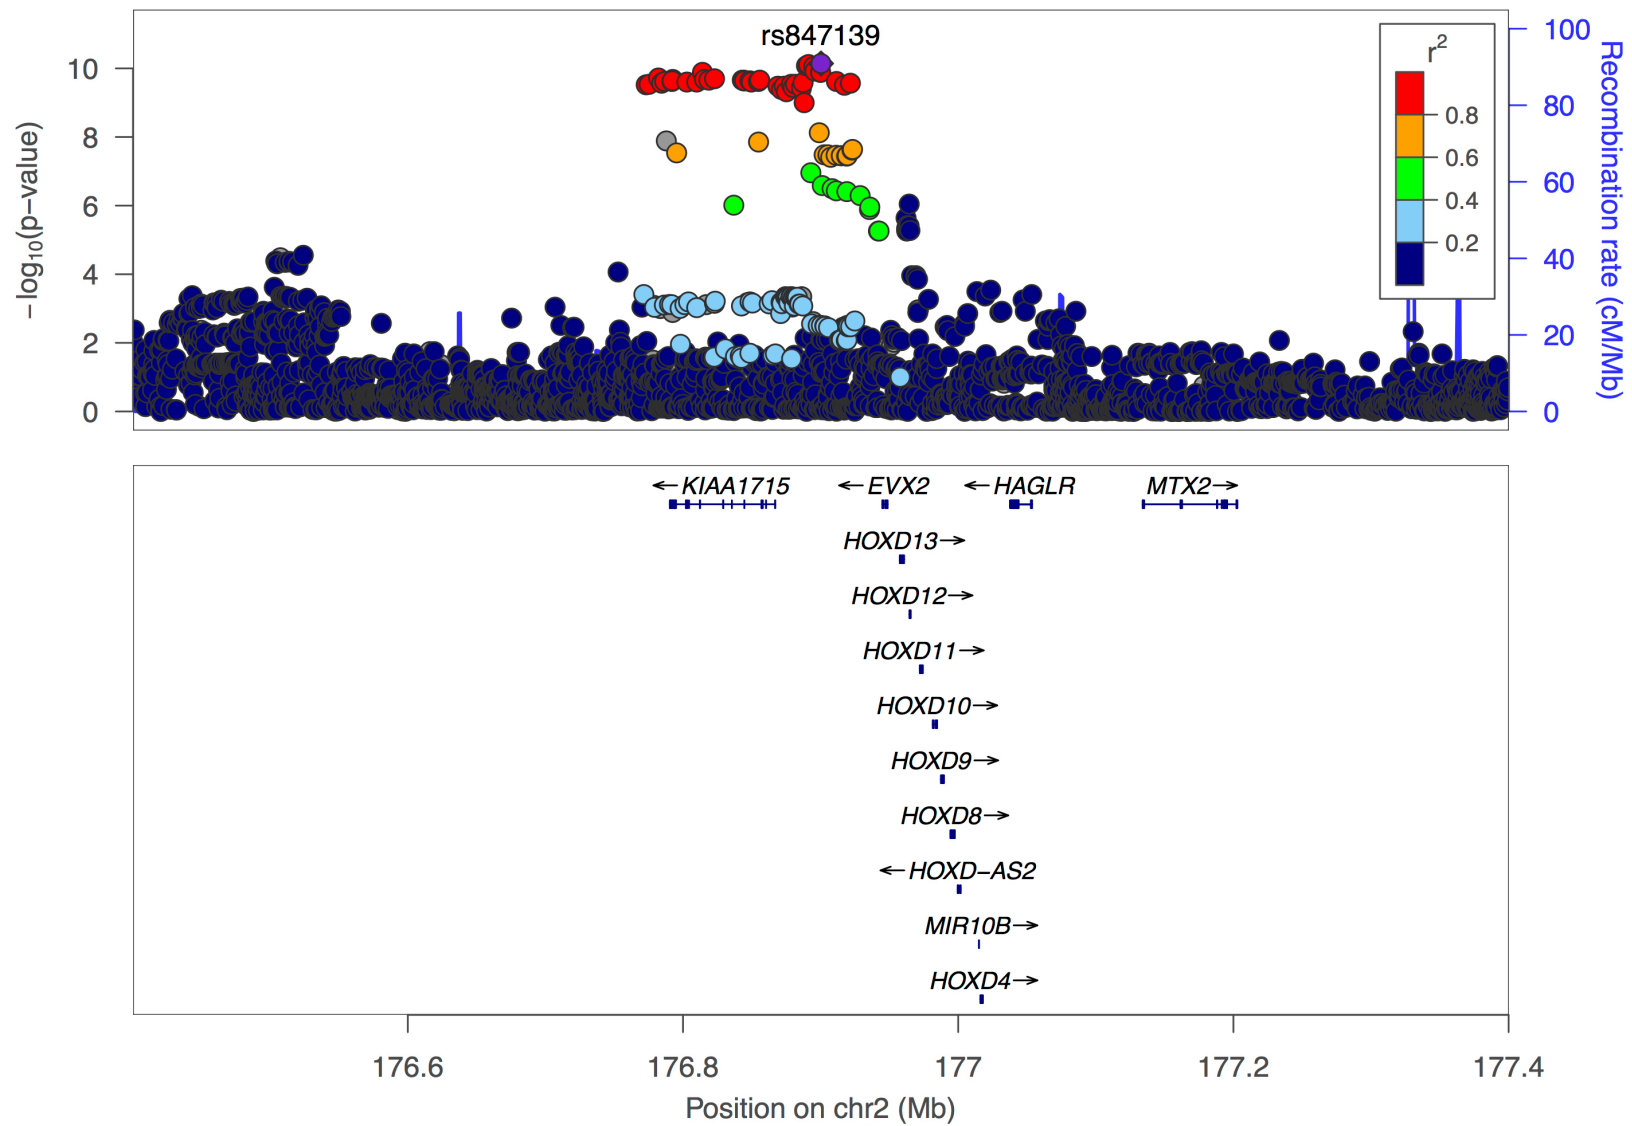

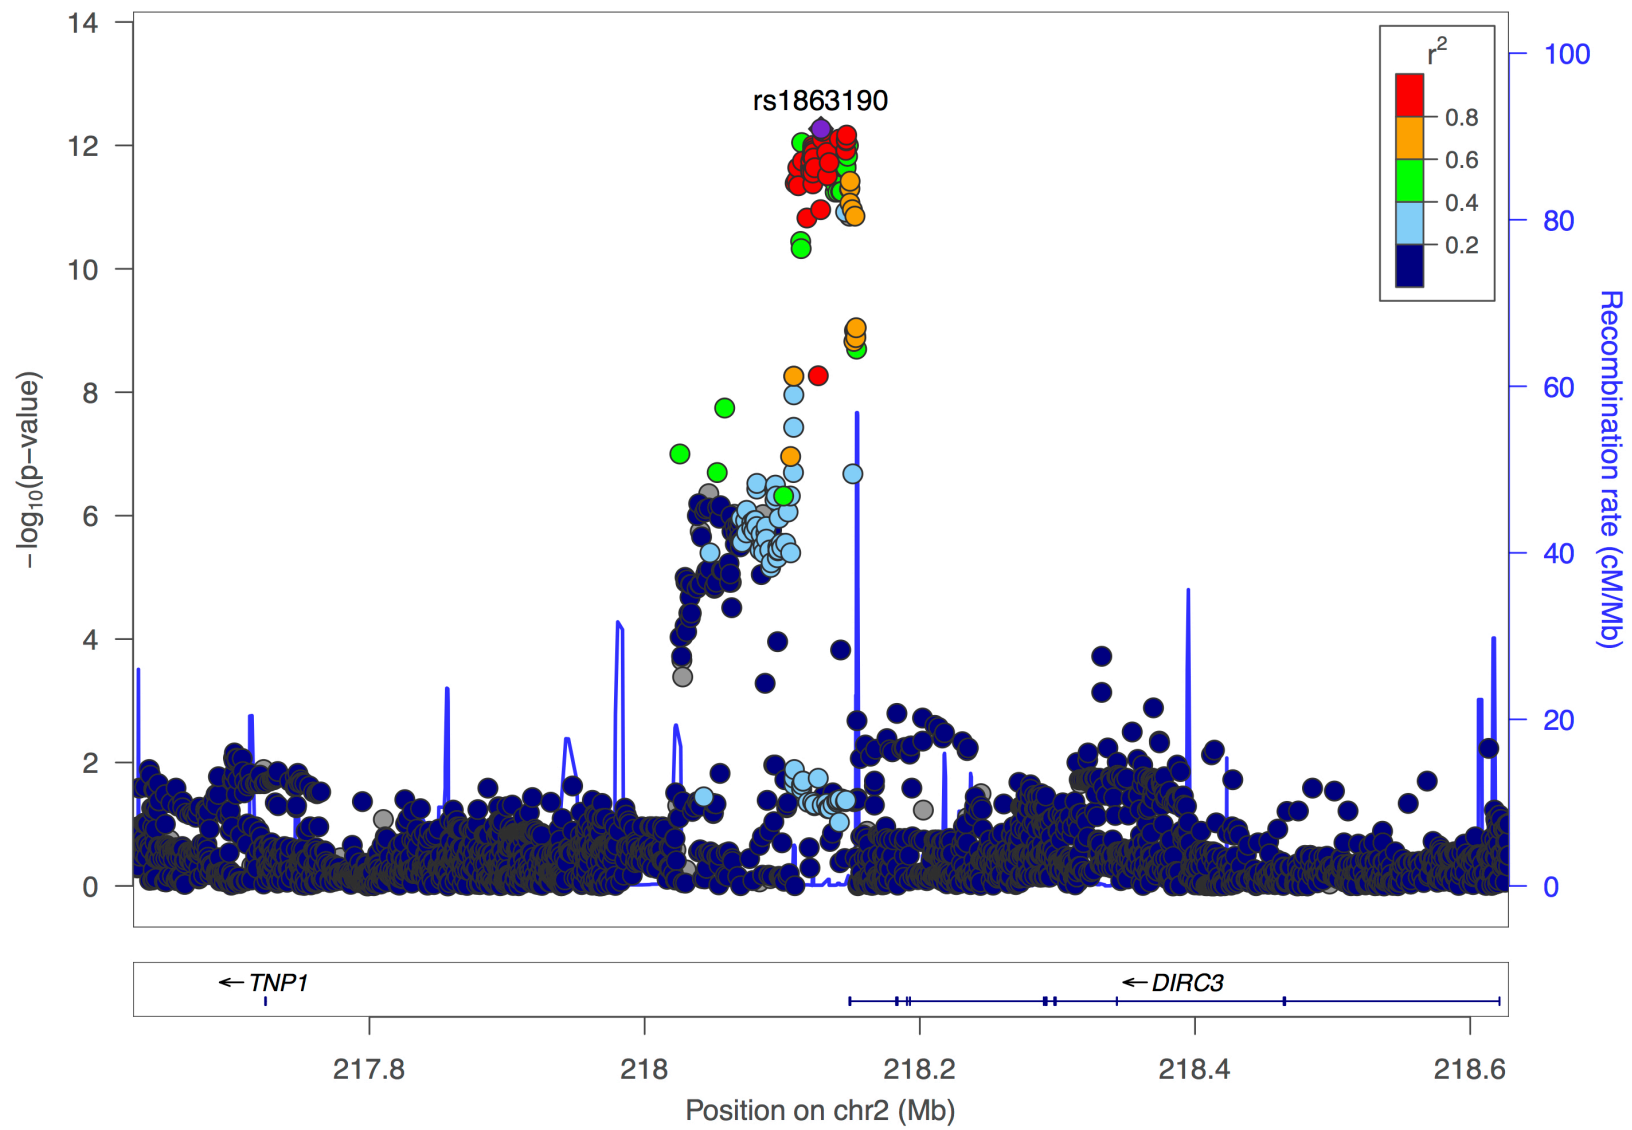



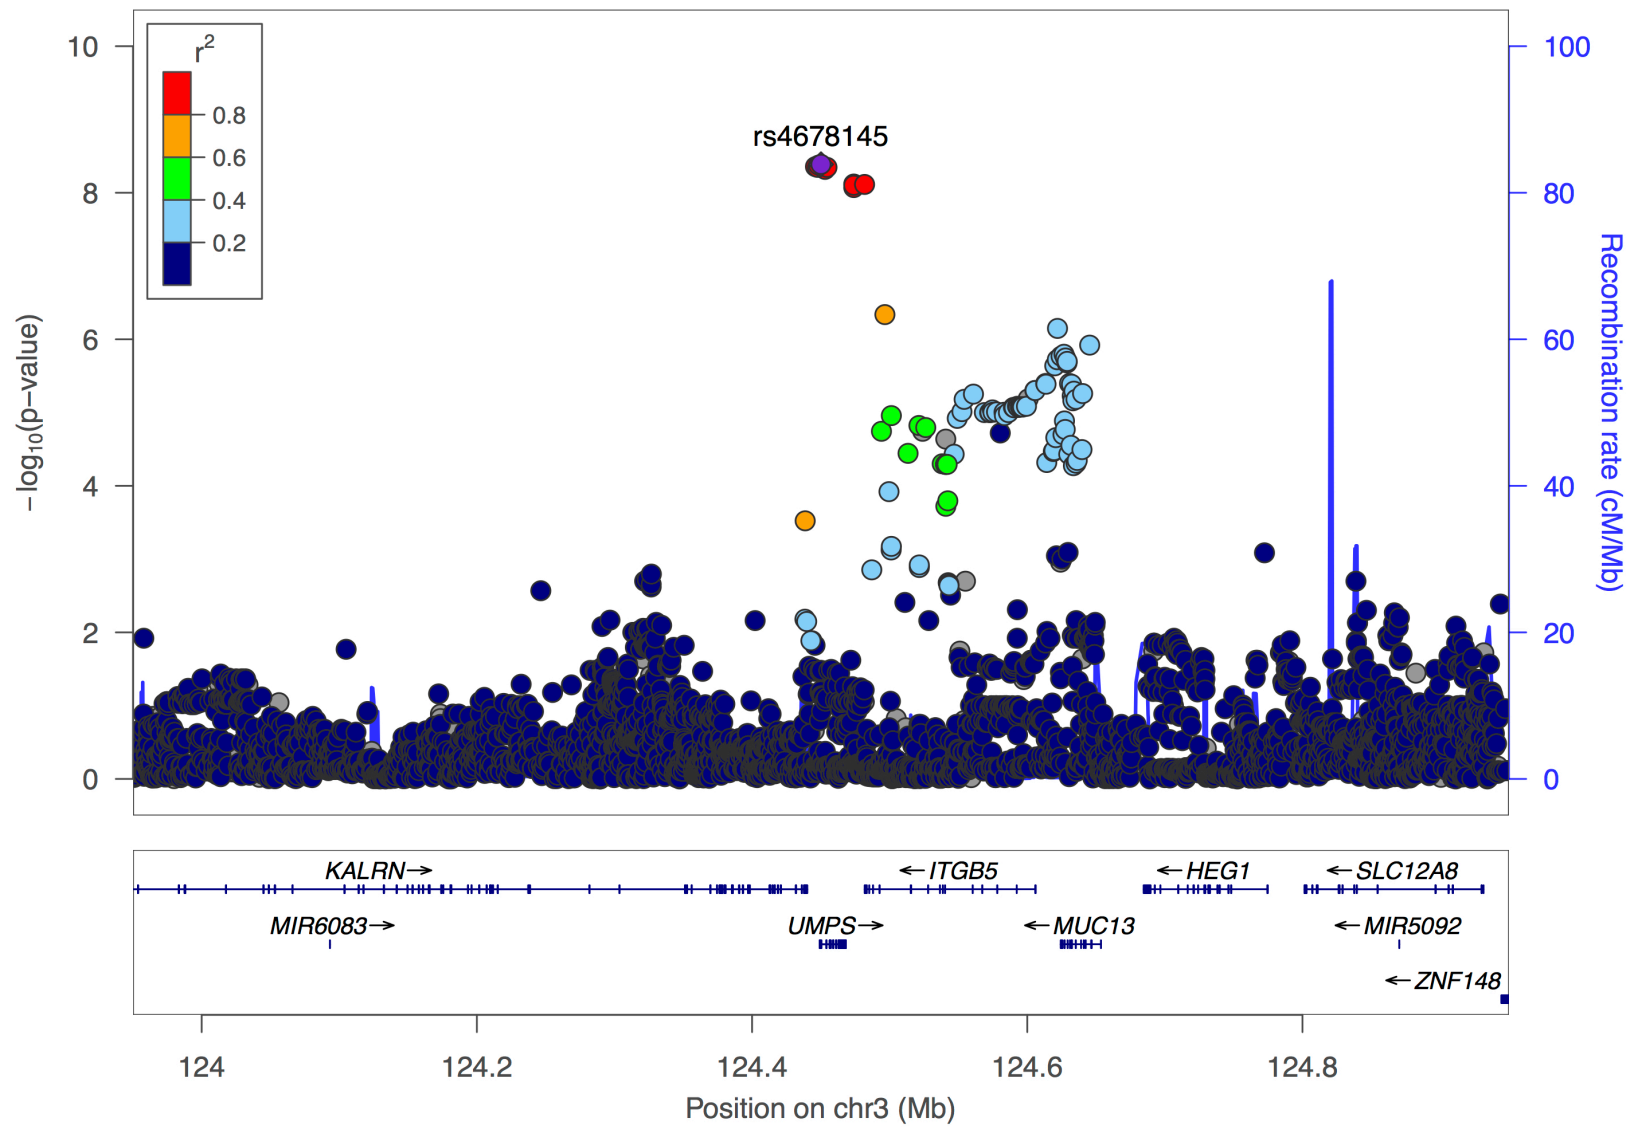

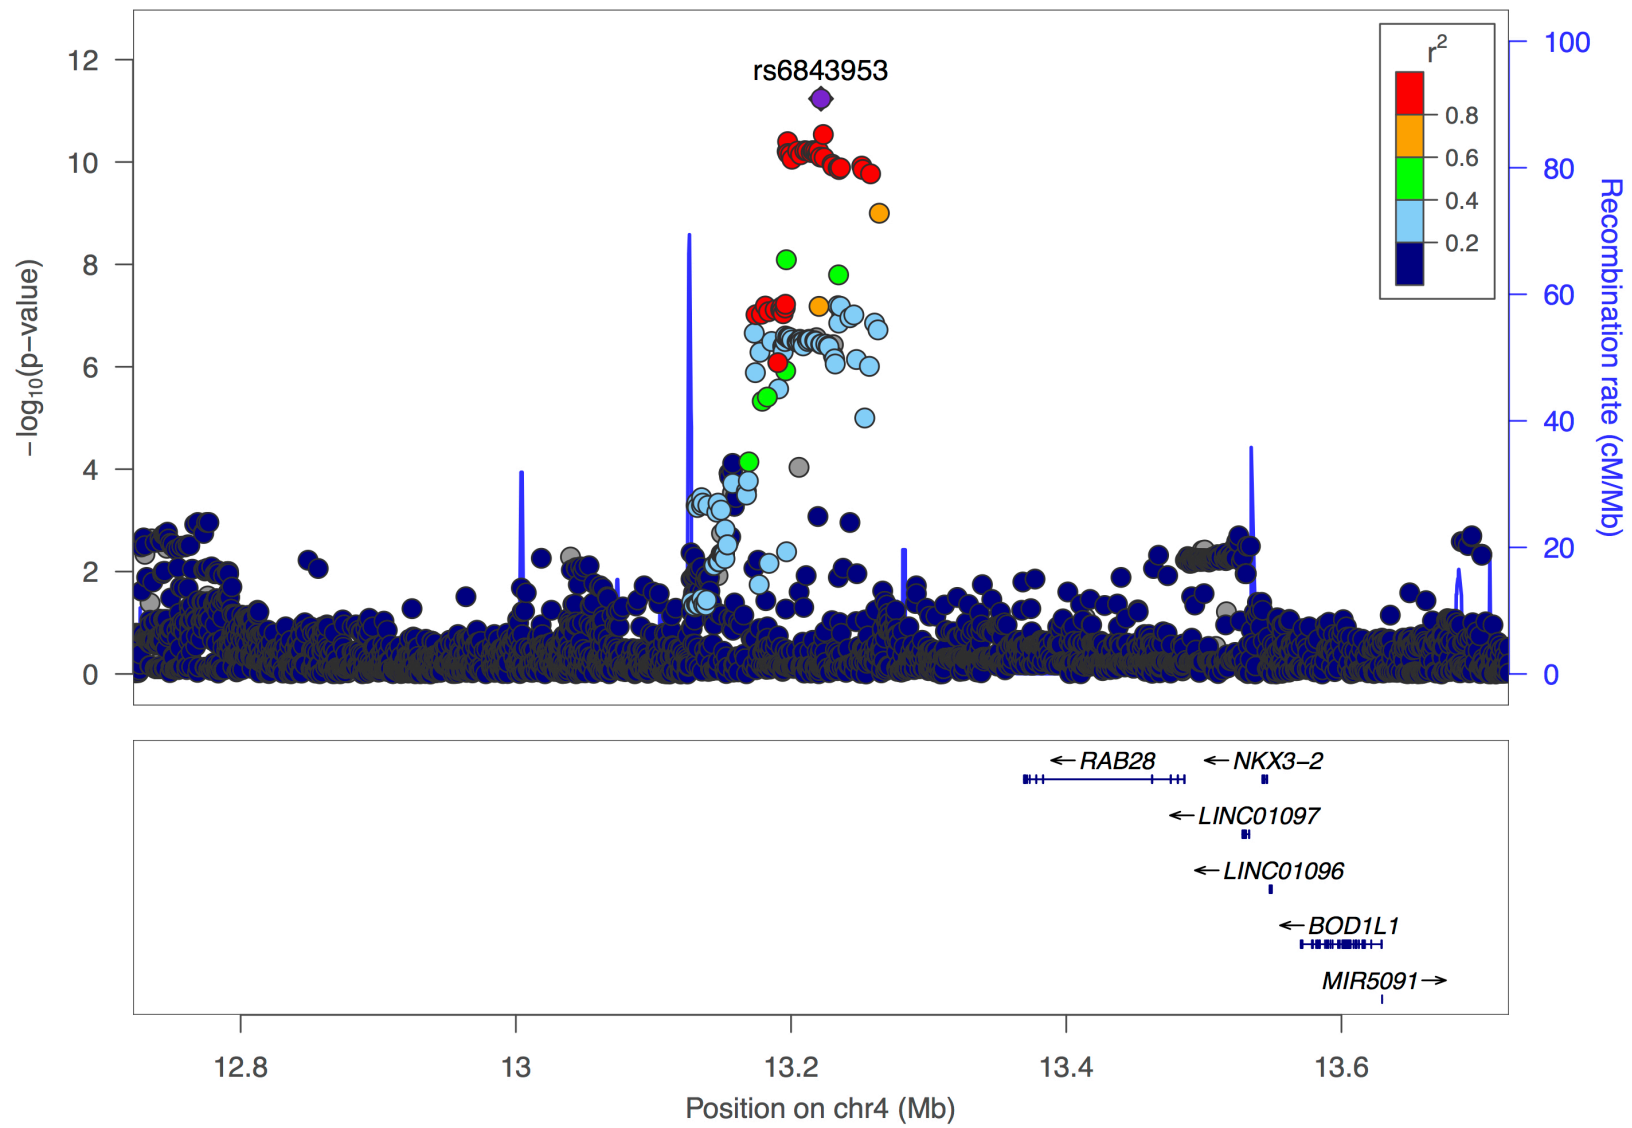

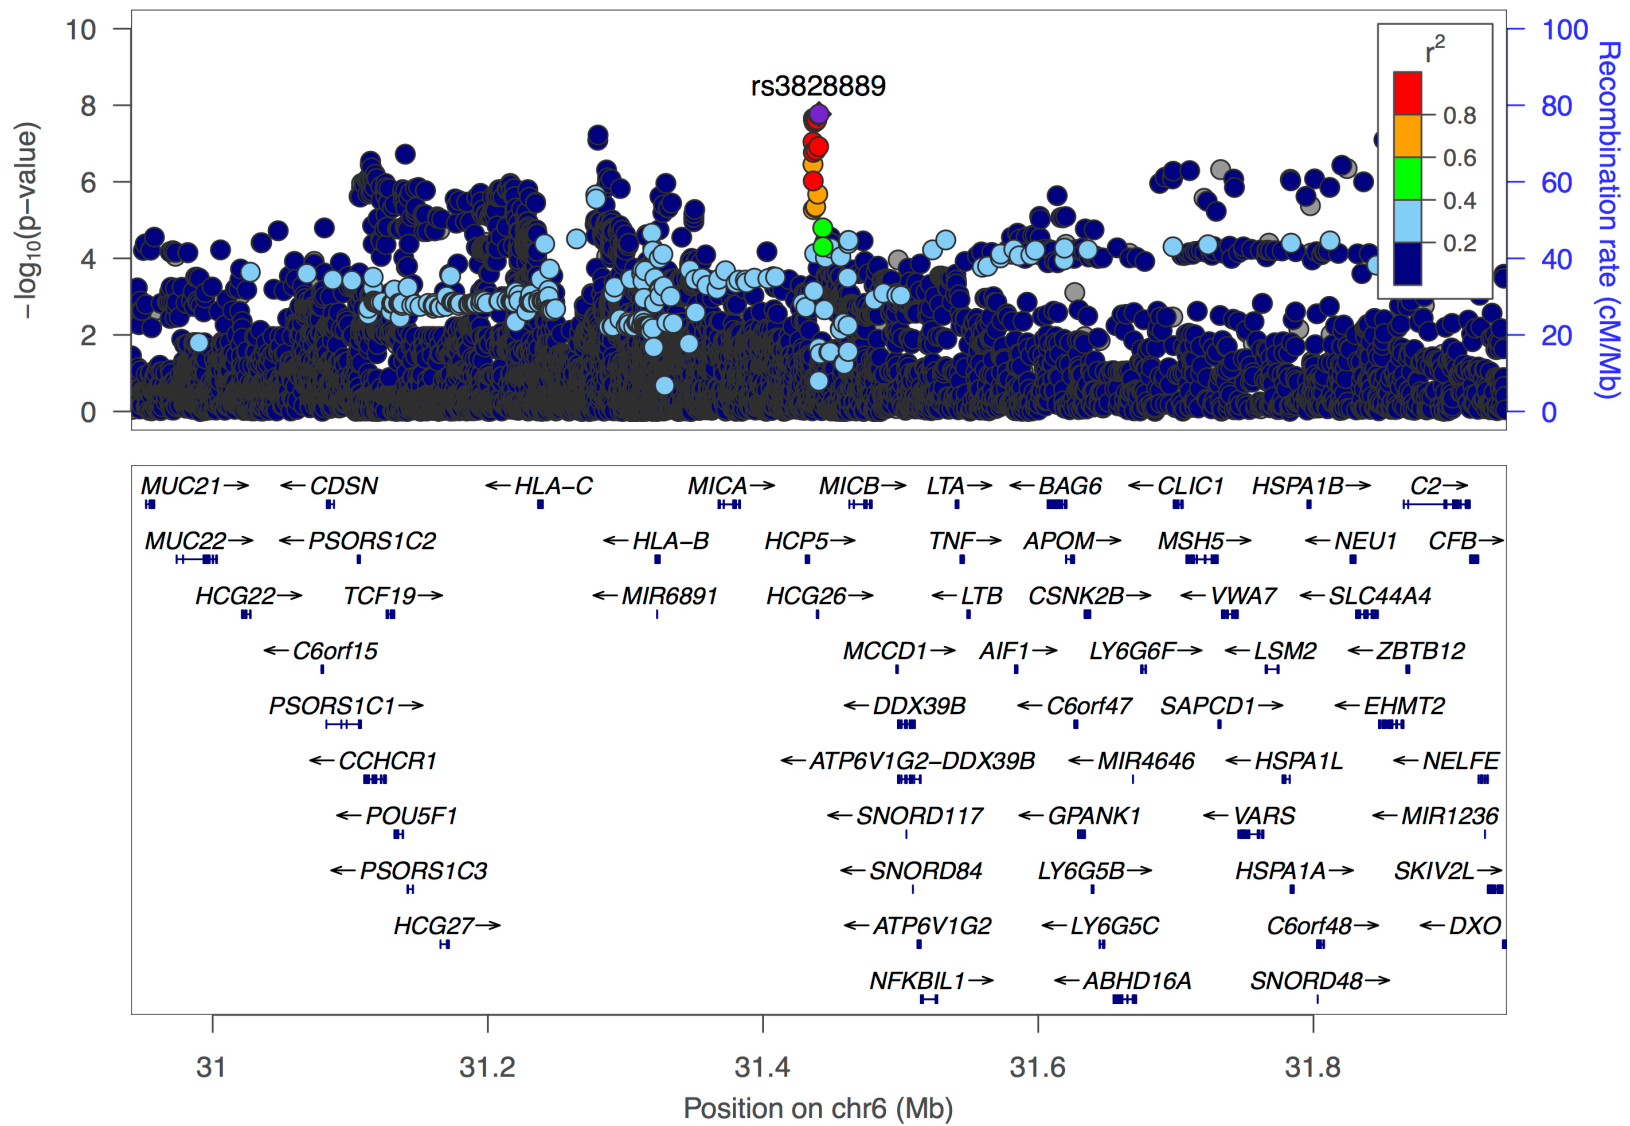

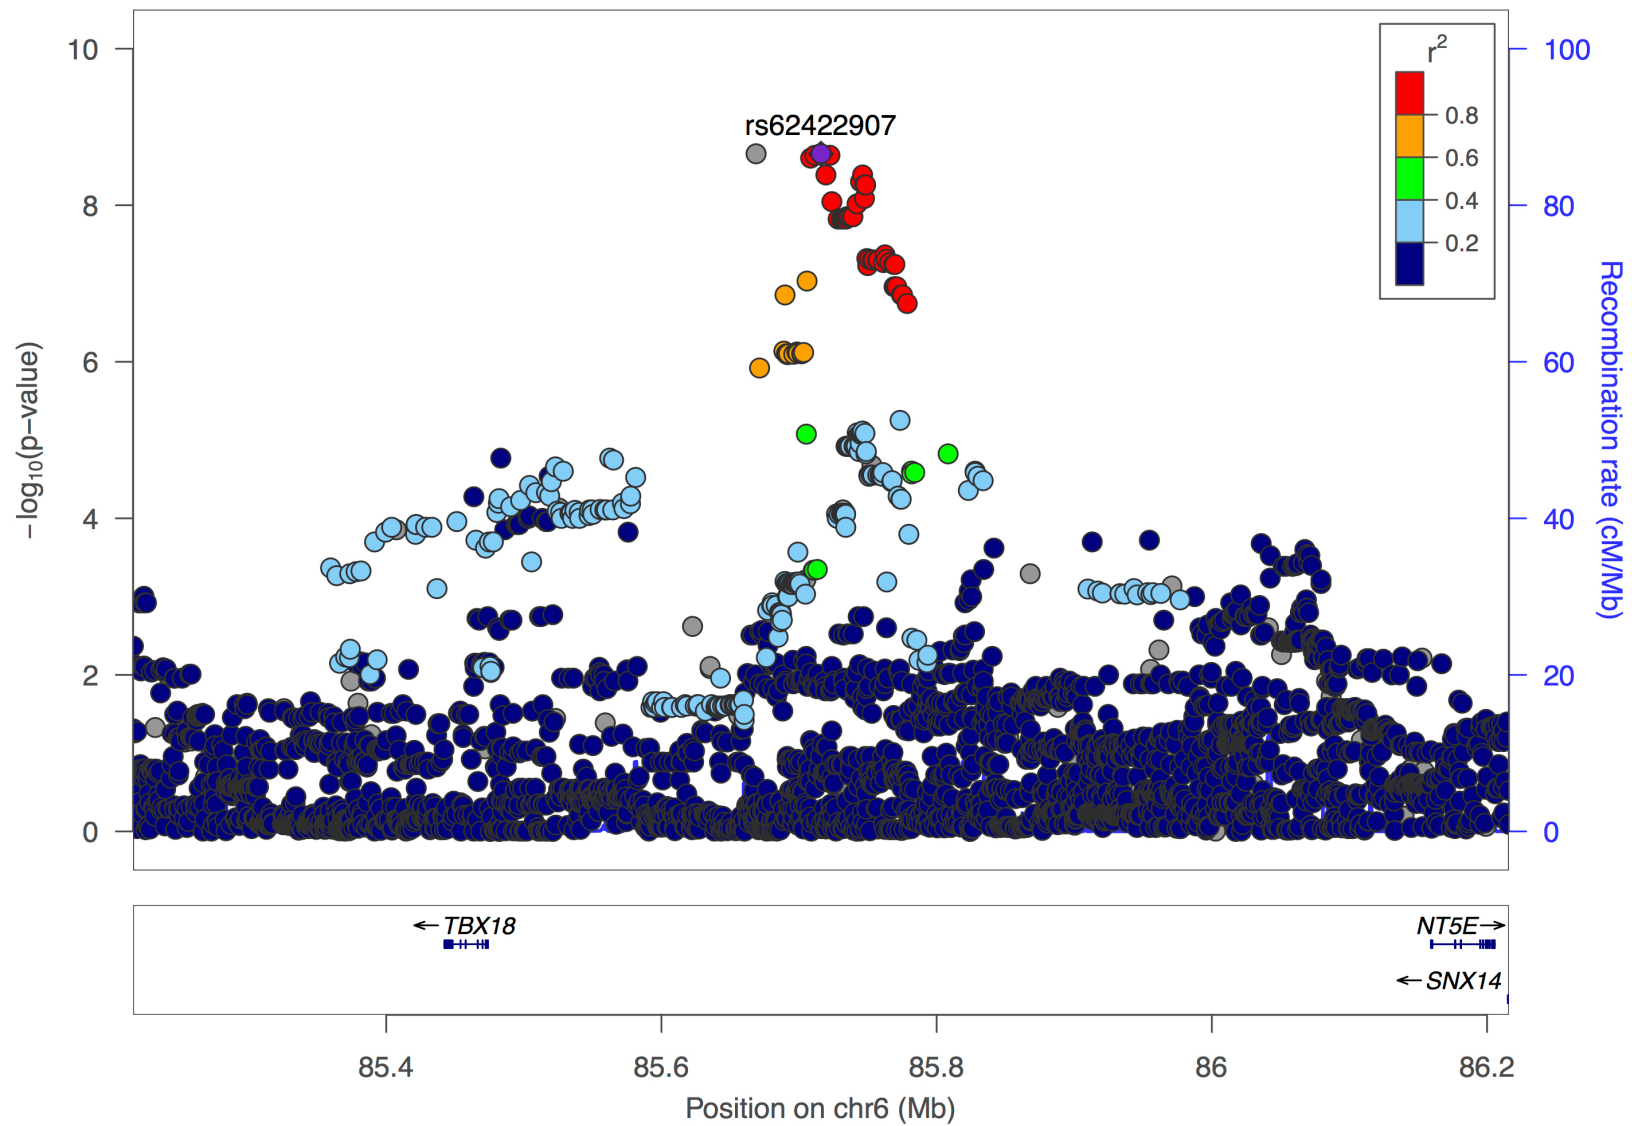

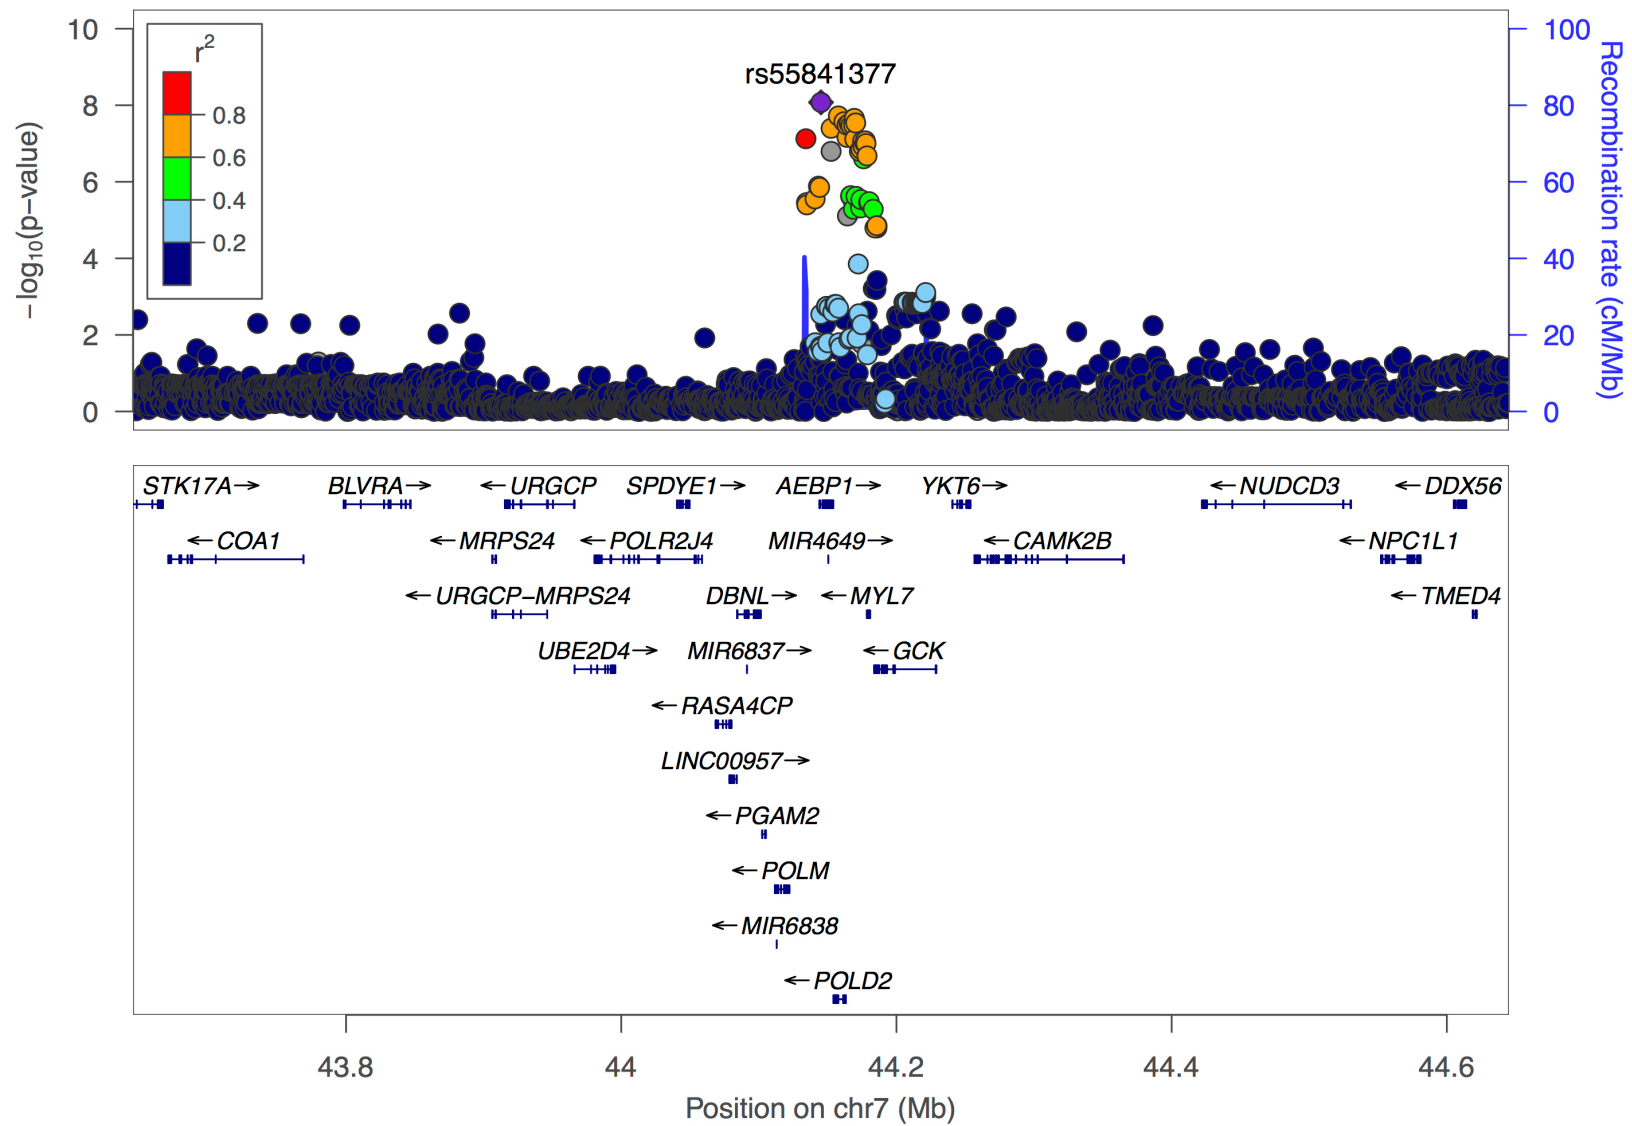

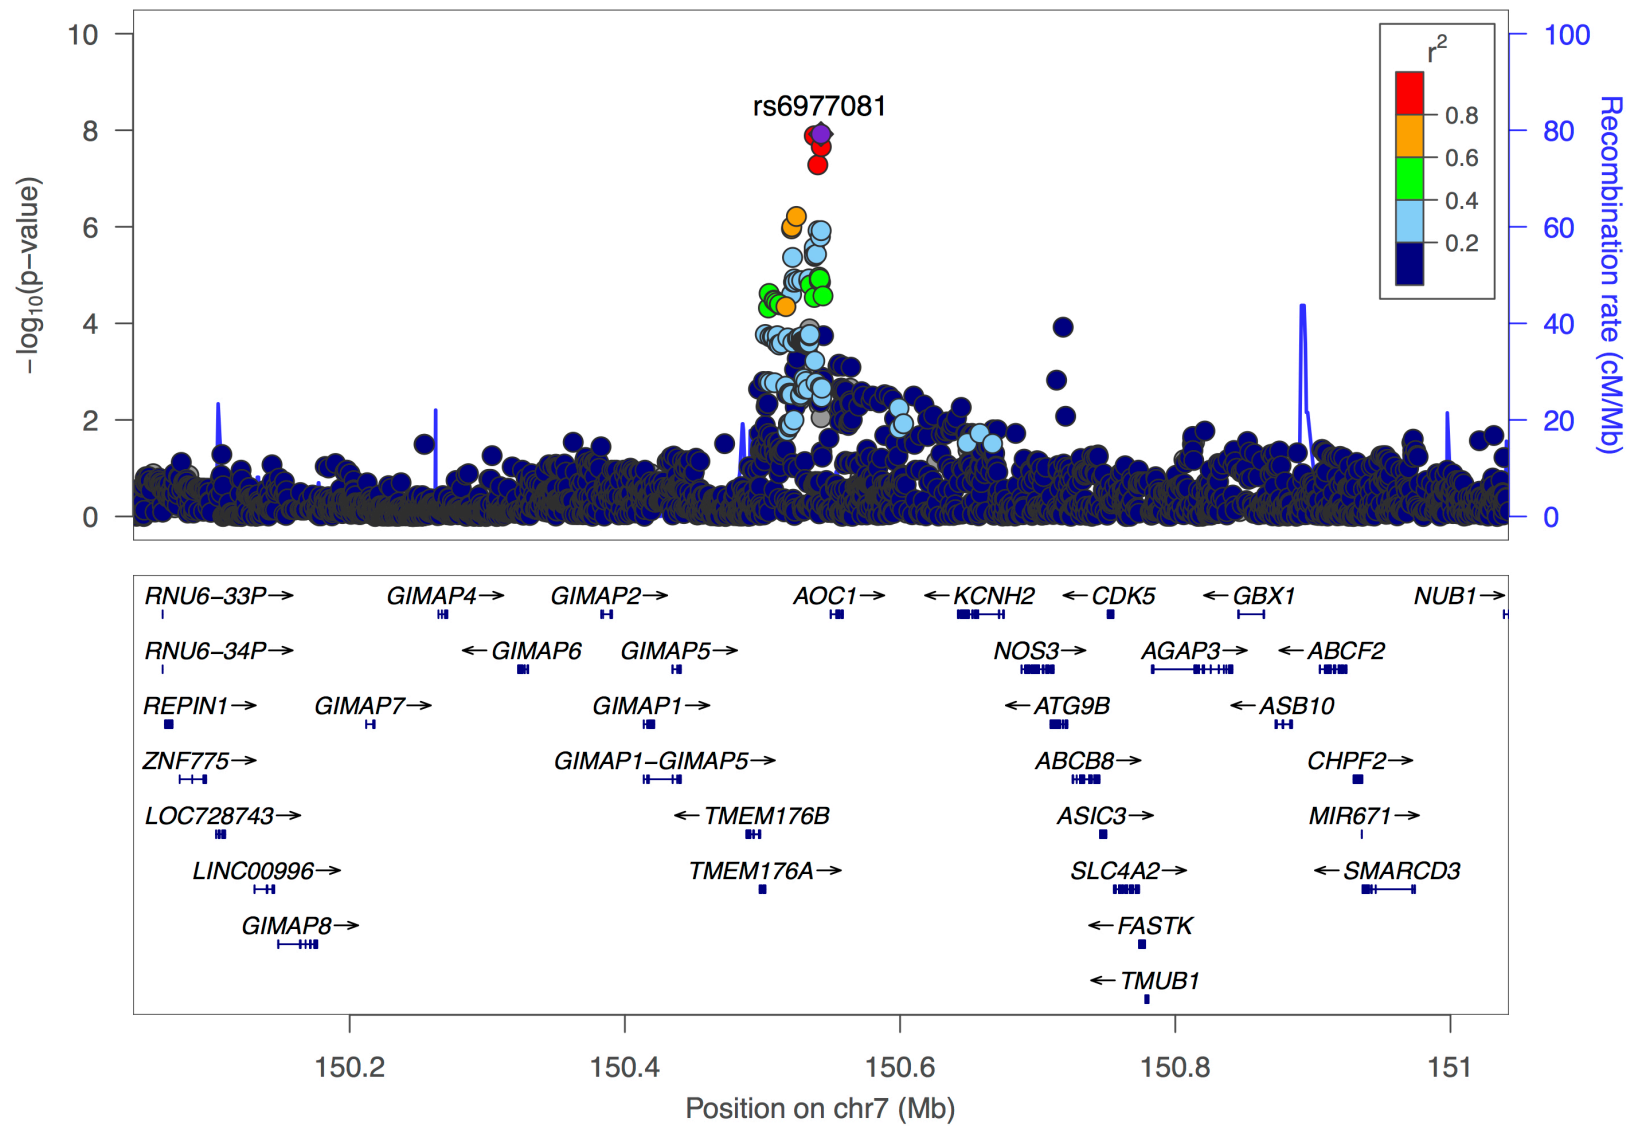

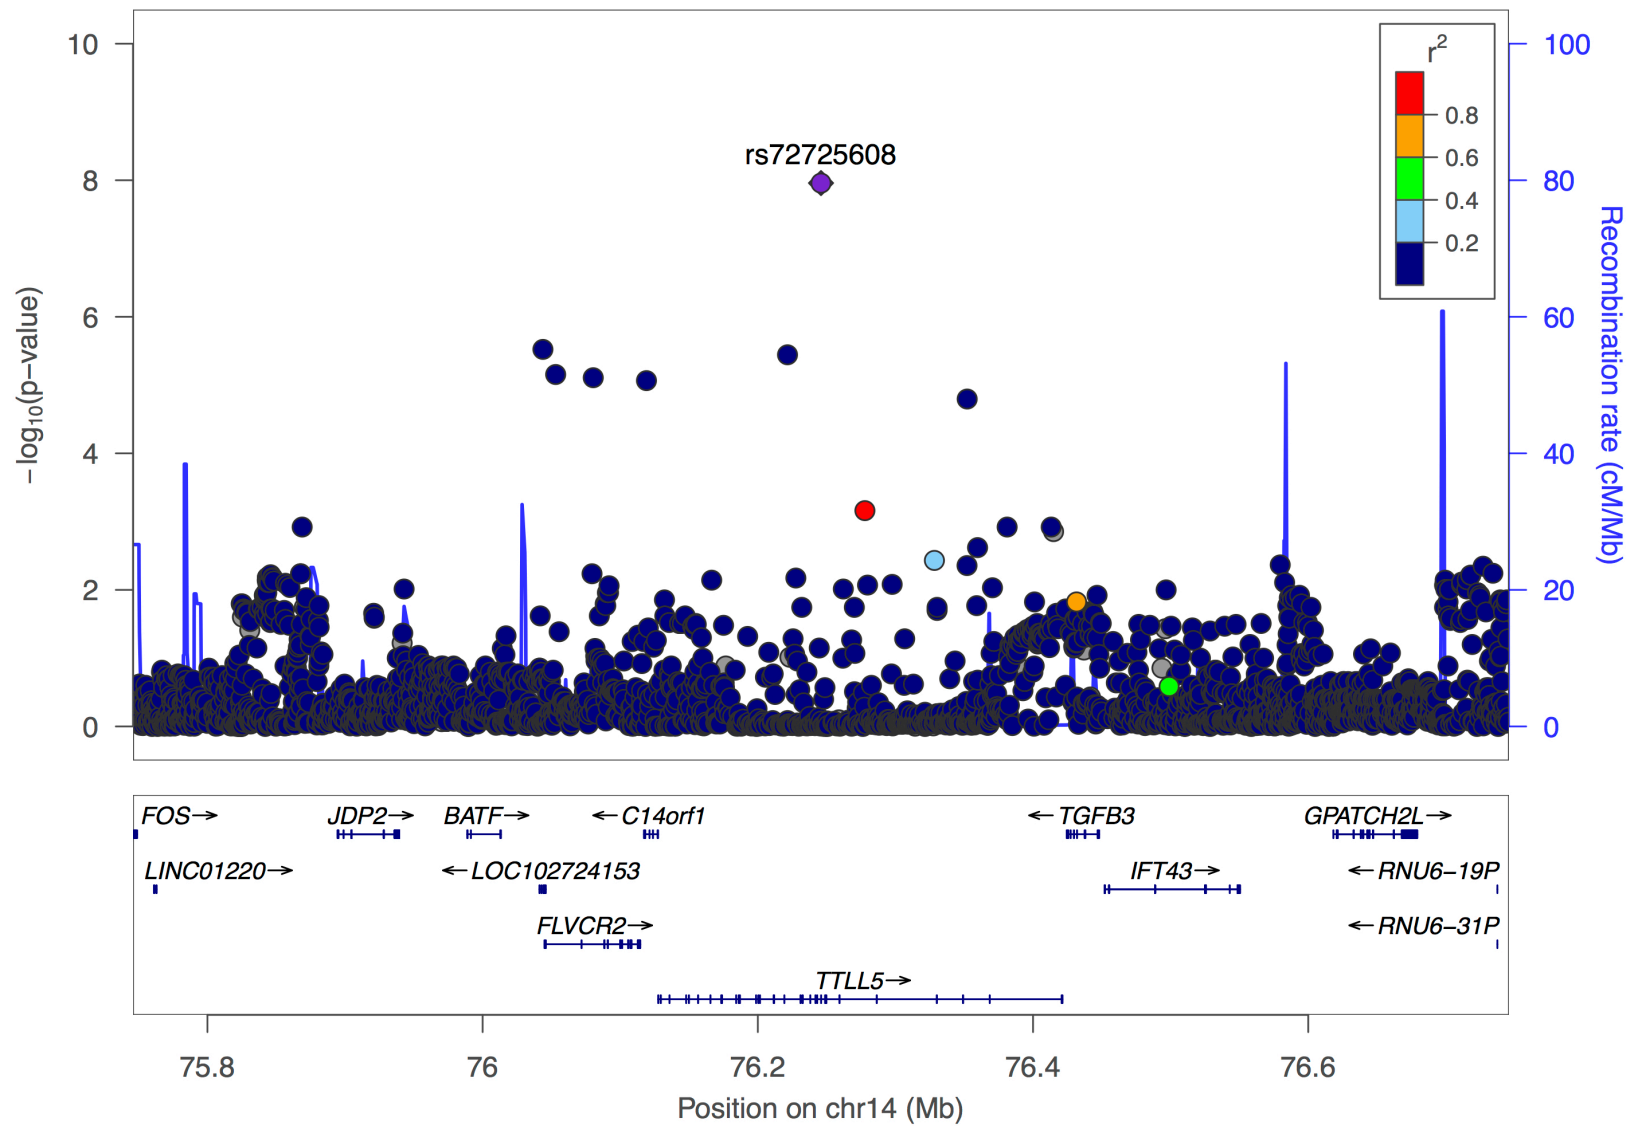

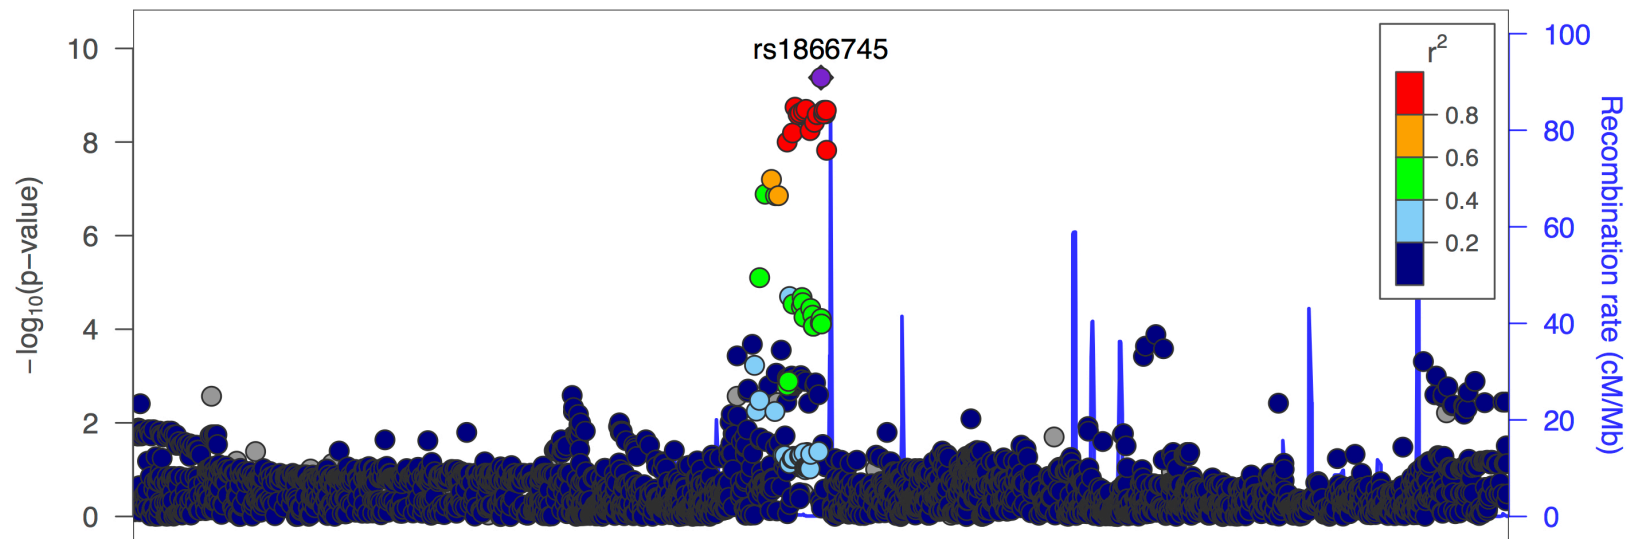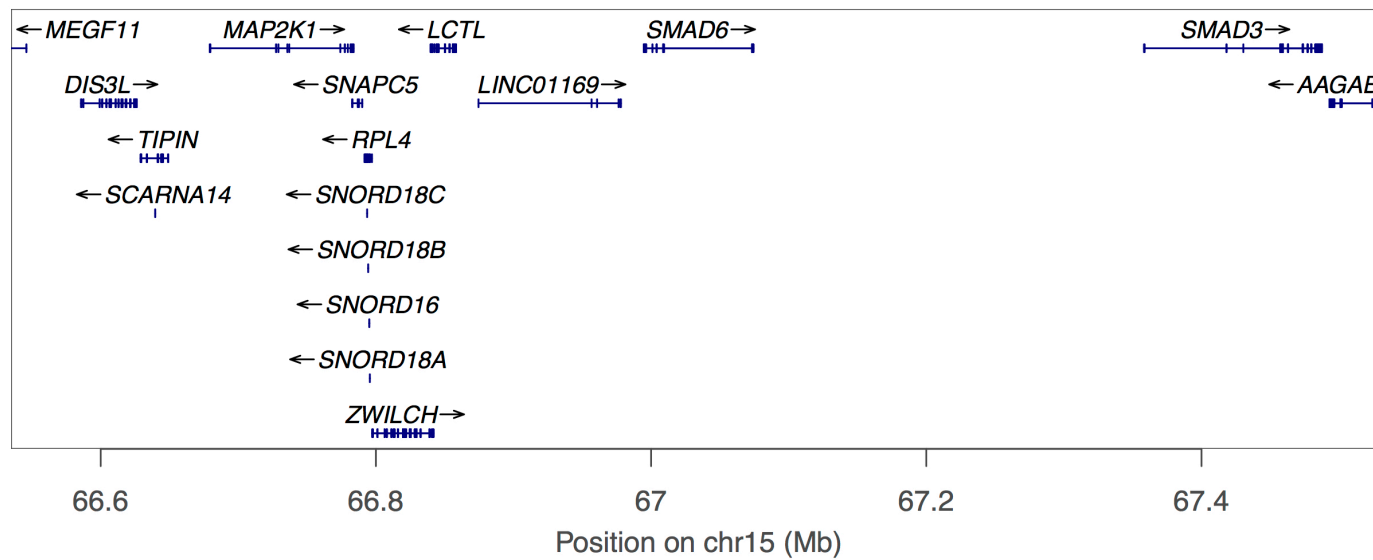



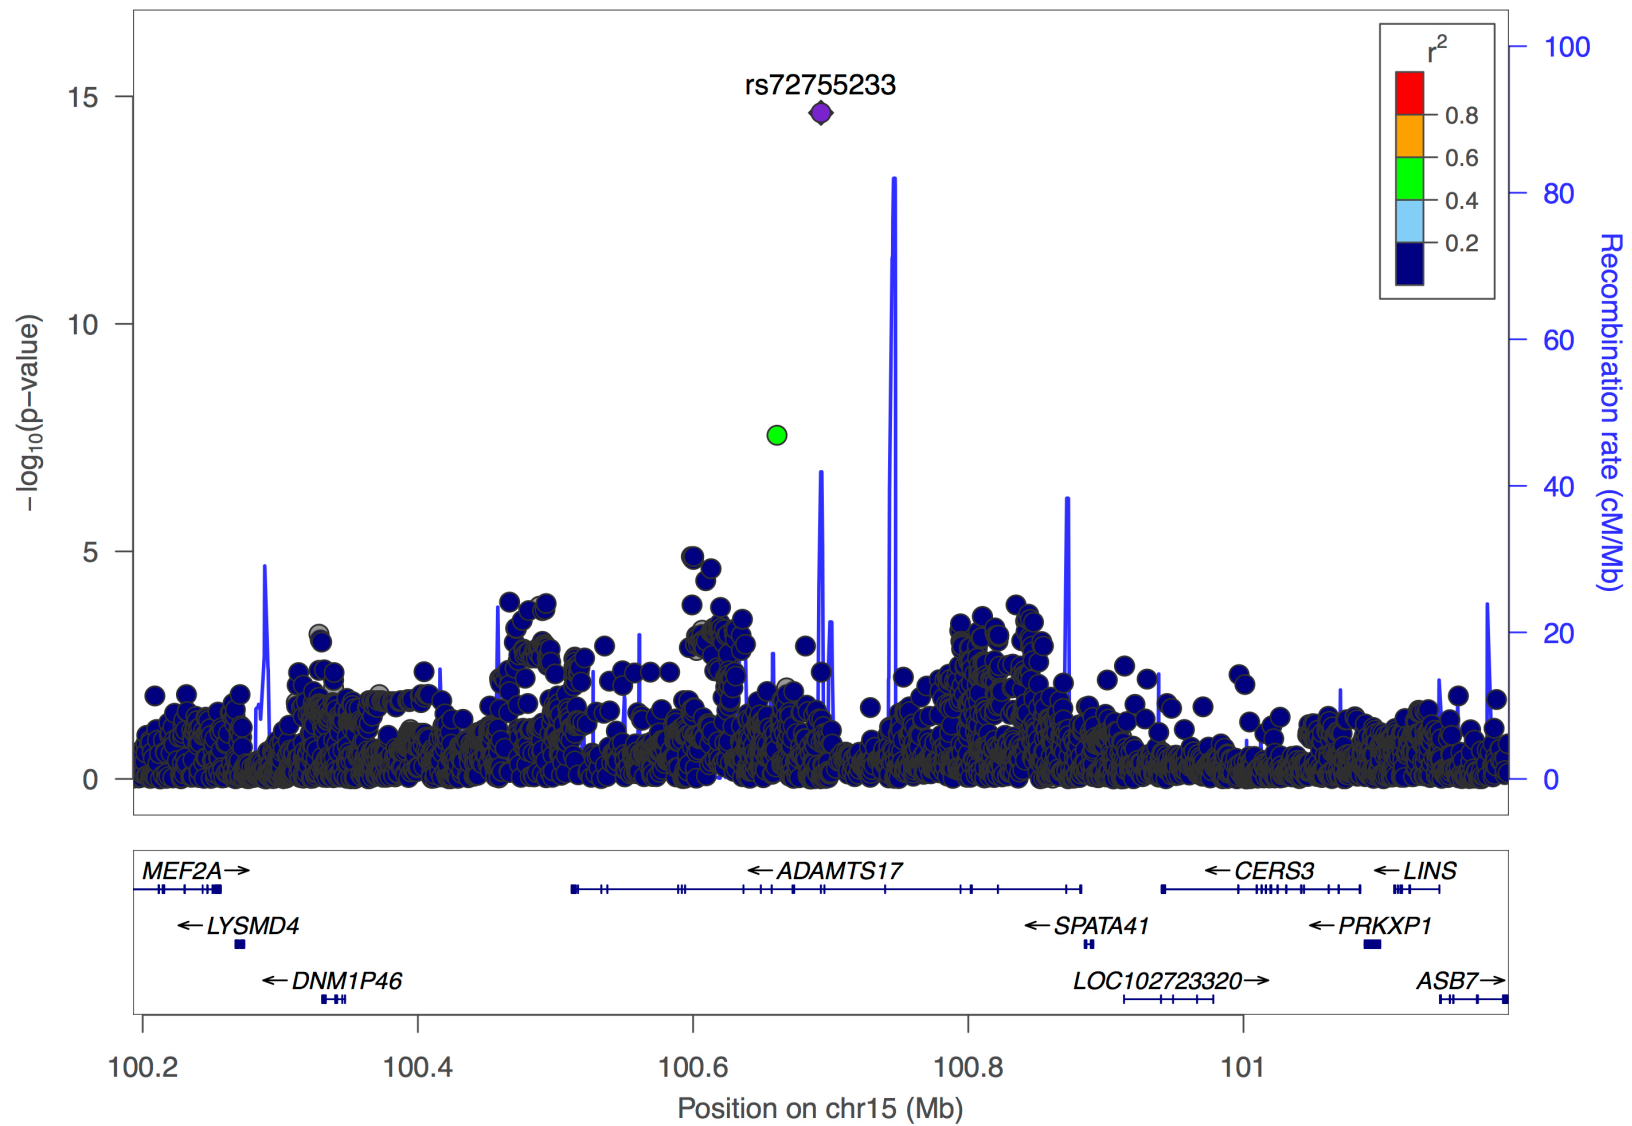

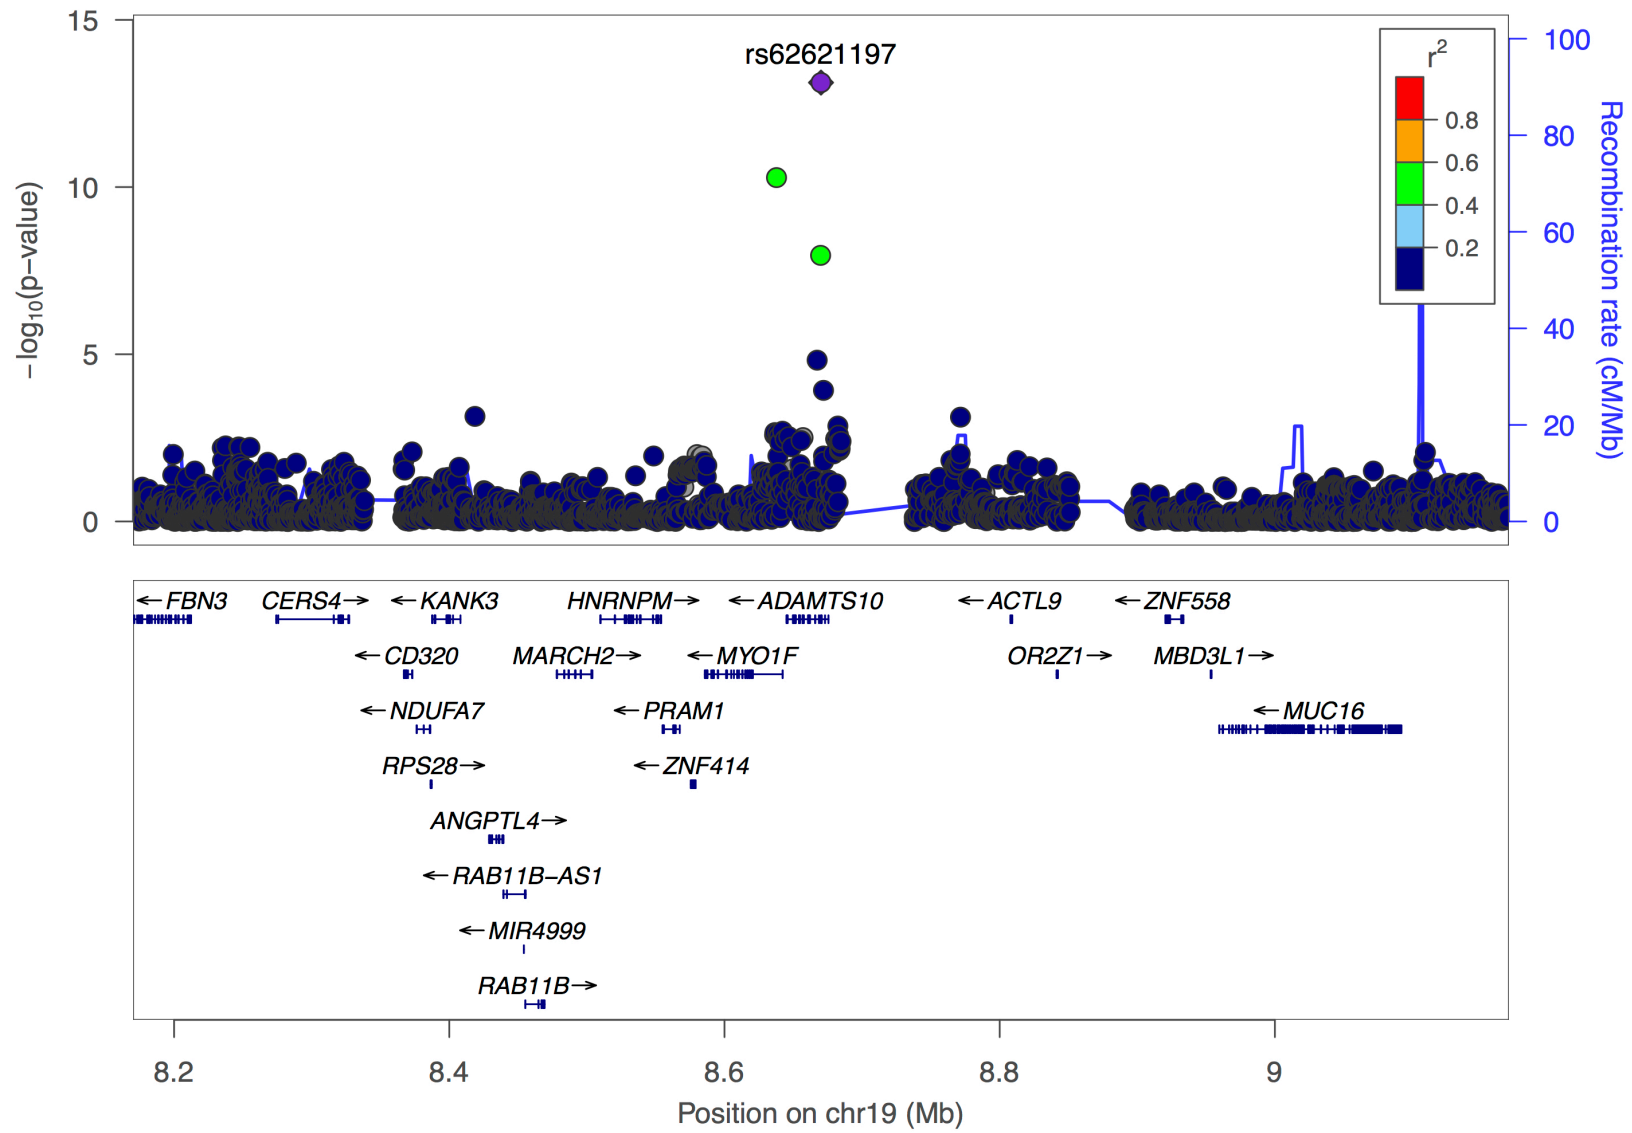

**Supplementary Figure 7. Regional Locus Zoom plots of all GWAS-associated loci.** LocusZoom plots of the 16 top-associated SNPs, ordered by chromosome number and genomic position. SNP position is shown on the x-axis, and strength of association on the y-axis. The linkage disequilibrium (LD) relationship between the lead SNP and the surrounding SNPs is indicated by the colour. In the lower panel of each figure, genes within 500kb of the index SNP are shown. The position on each chromosome is shown in relation to Human Genome build hg19.

## Supplementary Discussion

### Replication in Estonian Cohort

#### i) Background

We performed the first ever GWAS of Carpal Tunnel Syndrome (CTS), which is also the first ever GWAS in an entrapment neuropathy. Using a powerful resource such as UK Biobank allowed us to perform an association study with over 12,000 robustly phenotyped cases. Finding a suitably sized replication cohort proved challenging in a disease such as CTS, which has hitherto been relatively under-investigated from a genetic perspective. However, the Estonian Genome Center at the University of Tartu (EGCUT) identified approximately 4,000 CTS cases in their Biobank, and a replication study was therefore attempted.

#### ii) Methods

##### Cohort Description, Genotyping and Imputation

The Estonian Biobank is a population-based biobank of the Estonian Genome Center at the University of Tartu (EGCUT). All 51,886 participants have signed a broad informed consent form, which allows periodical linking to national registries, electronic health record databases and hospital information systems<sup>2</sup>. High-coverage whole genome sequencing data is available for the 2,535 individuals, selected randomly by county of birth. Biobank participants have been analysed using Illumina genotyping arrays: 1) Global Screening Array (GSA, N=33,277), 2) HumanCoreExome (CE, N=7,832), 3) HumanOmniExpress (OMNI, N=8,137), and 4) 370K (N=2,640). If samples were genotyped with different arrays, the following order of beadchips was preferred: GSA, CE, OMNI, 370K. The final set of genotyped data contained 48,163 unique individuals. Individuals with missing phenotype data were excluded.

The genotype calling for the microarrays was performed using Illumina's GenomeStudio v2010.3 software. The genotype calls for rare variants on the GSA array were corrected using the zCall software (version May 8th, 2012). After variant calling, the data were filtered using PLINK<sup>3</sup> v.1.90 by sample (call rate >95%, no sex mismatches between phenotype and genotype data, heterozygosity < mean  $\pm$ 3 SE) and by marker (HWE  $P > 1 \times 10^{-6}$ , call rate > 95%, and for the GSA array additionally by Illumina GenomeStudio GenTrain score >0.6, Cluster Separation Score >0.4). Before imputation, variants with MAF < 1% and C/G or T/A polymorphisms as well as indels were removed, as these genotype calls do not allow precise phasing and imputation.

Pre-phasing of genotyped data was performed using Eagle<sup>4</sup> v2.3 with default parameters, but --Kpbwt=20000 was specified to increase accuracy for all four arrays separately with Eagle and imputed with BEAGLE<sup>5</sup> v4.1, using a population-specific imputation reference panel<sup>6</sup>. All four imputed arrays were merged into a single dataset with BCFtools (<https://samtools.github.io/bcftools/bcftools.html>). Imputation information measures (INFO-value) were added using plugin 'impute-info' separately for both IRPs, monomorphic and multi-allelic imputed variants were excluded.

A description of the phenotyping methodology in EGCUT is described in detail elsewhere<sup>2</sup>. Case ascertainment performed using a mixture of self-reported and physician-confirmed CTS diagnoses identified a total of 4,438 CTS cases and 45,958 controls.

## Statistical Analyses

The association analysis was performed using an additive model in SNPTEST<sup>7</sup>, using year of birth, sex and the first 10 principal components as covariates. We extracted the relevant summary statistics for the 16 SNPs that were genome-wide significant in the discovery GWAS, and calculated the weighted genetic risk score for CTS in both cases and controls in the EGCUT cohort using the summary statistics from the UK Biobank discovery GWAS (our method has been described in the main manuscript). We also performed LD score regression<sup>8</sup> to estimate the degree of genetic correlation between the UK Biobank and EGCUT summary statistics.

### iii) Results

#### Demographics:

The demographic characteristics of the two cohorts are shown side-by-side, separated by sex. The overall female preponderance was 54.1% in UK Biobank and 65.9% in EGCUT.

|                |               | UKB Cases    | UKB Controls | UKB All     | EGCUT Cases | EGCUT Controls | EGCUT All   |
|----------------|---------------|--------------|--------------|-------------|-------------|----------------|-------------|
| <b>Males</b>   | N             | 3,738        | 180,761      | 184,499     | 783         | 16,390         | 17,173      |
|                | Prevalence    | 0.02         |              |             | 0.046       |                |             |
|                | Age (s.d.)    | 69.0 (7.4)   | 67.0 (7.4)   | 67.1 (8.1)  | 49.8 (14.9) | 41.9 (18.0)    | 42.3 (17.9) |
|                | Height (s.d.) | 173.8 (6.7)  | 175.9 (6.7)  | 175.9 (6.8) | 176.6 (6.8) | 178.8 (7.3)    | 178.7 (7.3) |
|                | Weight (s.d.) | 90.35 (15.9) | 86.1 (14.2)  | 86.2 (14.3) | 88.4 (16.3) | 84.1 (15.6)    | 84.2 (15.7) |
| <b>Females</b> | N             | 8,574        | 208,583      | 217,157     | 3,655       | 29,568         | 33,223      |
|                | Prevalence    | 0.039        |              |             | 0.11        |                |             |
|                | Age (s.d.)    | 68.3 (7.1)   | 66.6 (8.0)   | 66.6 (7.9)  | 49.5 (13.2) | 43.9 (17.6)    | 44.5 (17.2) |
|                | Height (s.d.) | 160.7 (6.2)  | 162.7 (6.2)  | 162.6 (6.2) | 163.4 (6.1) | 165.0 (6.5)    | 164.8 (6.5) |
|                | Weight (s.d.) | 75.3 (15.9)  | 71.4 (13.8)  | 71.5 (13.9) | 76.1 (16.8) | 70.3 (14.8)    | 71.0 (15.2) |

The graph below demonstrates the age distribution of the EGCUT cohort:

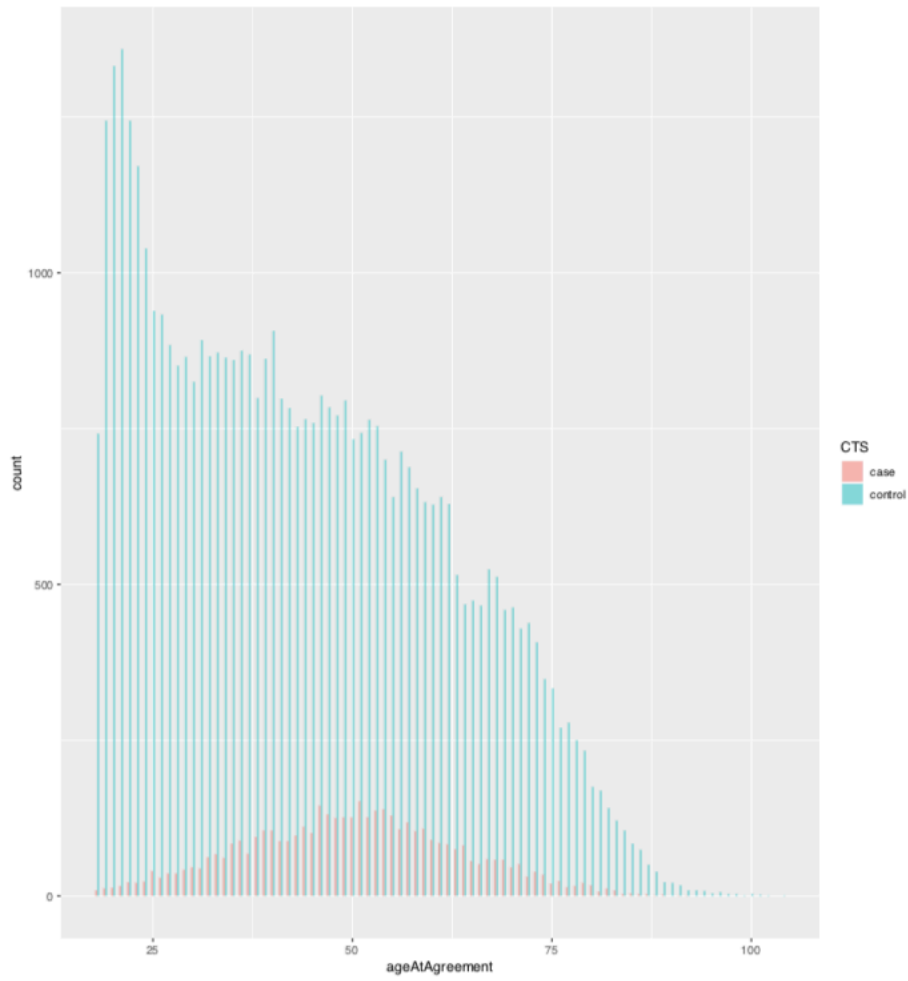

Summary statistics:

The summary statistics for the 16 genome-wide significant discovery SNPs in the EGCUT cohort are shown below, alongside the summary statistics from the discovery GWAS in the UK Biobank cohort. P-values are unadjusted.

| rsID       | UK BIOBANK    |           |              |                  |                        | EGCUT         |           |              |                   |         | Directionally concordant? |
|------------|---------------|-----------|--------------|------------------|------------------------|---------------|-----------|--------------|-------------------|---------|---------------------------|
|            | Effect Allele | EAF Cases | EAF Controls | OR (95% CI)      | P-value                | Effect Allele | EAF Cases | EAF Controls | (95% CI)          | P-value |                           |
| rs12406439 | T             | 0.605     | 0.587        | 1.08 (1.05-1.11) | 1.10×10 <sup>-8</sup>  | T             | 0.627     | 0.617        | 1.04 (0.99-1.09)  | 0.050   | Yes                       |
| rs12104955 | C             | 0.517     | 0.499        | 1.07 (1.05-1.10) | 3.90×10 <sup>-8</sup>  | C             | 0.455     | 0.447        | 1.03 (0.99-1.08)  | 0.116   | Yes                       |
| rs3791679  | G             | 0.244     | 0.225        | 1.11 (1.08-1.15) | 2.00×10 <sup>-12</sup> | G             | 0.276     | 0.271        | 1.02 (0.98-1.08)  | 0.327   | Yes                       |
| rs1025128  | C             | 0.582     | 0.563        | 1.08 (1.05-1.11) | 2.80×10 <sup>-9</sup>  | C             | 0.676     | 0.668        | 1.03 (0.99-1.09)  | 0.105   | Yes                       |
| rs847139   | C             | 0.805     | 0.787        | 1.11 (1.07-1.14) | 7.20×10 <sup>-11</sup> | C             | 0.820     | 0.815        | 1.03 (0.97-1.09)  | 0.169   | Yes                       |
| rs1863190  | T             | 0.780     | 0.760        | 1.12 (1.08-1.15) | 5.40×10 <sup>-13</sup> | T             | 0.708     | 0.701        | 1.03 (0.98-1.08)  | 0.264   | Yes                       |
| rs4678145  | G             | 0.880     | 0.868        | 1.12 (1.08-1.16) | 4.10×10 <sup>-9</sup>  | G             | 0.914     | 0.905        | 1.10 (1.02-1.20)  | 0.014   | Yes                       |
| rs6843953  | T             | 0.154     | 0.138        | 1.14 (1.10-1.18) | 5.80×10 <sup>-12</sup> | T             | 0.096     | 0.0924       | 1.04 (0.97-1.13)  | 0.338   | Yes                       |
| rs3828889  | C             | 0.748     | 0.732        | 1.09 (1.06-1.12) | 1.70×10 <sup>-8</sup>  | C             | 0.692     | 0.694        | 0.99 (0.95-1.04)  | 0.757   | No                        |
| rs62422907 | G             | 0.899     | 0.887        | 1.13 (1.09-1.18) | 2.20×10 <sup>-9</sup>  | G             | 0.911     | 0.916        | 0.94 (0.86-1.01)  | 0.088   | No                        |
| rs55841377 | C             | 0.789     | 0.773        | 1.09 (1.06-1.13) | 8.40×10 <sup>-9</sup>  | C             | 0.841     | 0.838        | 1.02 (0.95-1.08)  | 0.500   | Yes                       |
| rs6977081  | G             | 0.685     | 0.668        | 1.08 (1.05-1.11) | 1.20×10 <sup>-8</sup>  | G             | 0.610     | 0.603        | 1.03 (0.98-1.08)  | 0.239   | Yes                       |
| rs72725608 | C             | 0.051     | 0.044        | 1.20 (1.13-1.27) | 1.10×10 <sup>-8</sup>  | C             | 0.0335    | 0.031        | 1.09 (0.96-1.24)  | 0.165   | Yes                       |
| rs1866745  | A             | 0.369     | 0.35         | 1.09 (1.06-1.12) | 4.20×10 <sup>-10</sup> | A             | 0.324     | 0.325        | 0.997 (0.95-1.24) | 0.848   | No                        |
| rs72755233 | A             | 0.128     | 0.112        | 1.18 (1.13-1.22) | 2.30×10 <sup>-15</sup> | A             | 0.145     | 0.139        | 1.05 (0.99-1.12)  | 0.086   | Yes                       |
| rs62621197 | T             | 0.045     | 0.036        | 1.31 (1.22-1.40) | 7.50×10 <sup>-14</sup> | T             | 0.049     | 0.042        | 1.18 (1.06-1.31)  | 0.002   | Yes                       |

Weighted Genetic Risk Score:

|            | GRS in CTS cases | GRS in controls |
|------------|------------------|-----------------|
| UK Biobank | 1.620            | 1.566           |
| EGCUT      | 1.519            | 1.142           |

L.D. Score Regression

The genetic correlation ( $r_g$ ) between UK Biobank and EGCUT GWAS of CTS was 0.9044 (SE 0.0031), Z score = 5.76,  $p = 8.19 \times 10^{-9}$ .

#### iv) Discussion

In this replication study, 13 out of 16 loci discovered in the UK Biobank discovery GWAS were directionally concordant in the EGCUT replication cohort, but only one SNP (rs62621197) achieved significance at a Bonferroni-corrected p-value threshold of 0.0031 (0.05/16). However, there is significant genetic correlation between the two cohorts, as evidenced by the correlation coefficient of 0.90 on LD score regression; furthermore, the separation of weighted genetic risk scores between cases and controls in EGCUT showed a similar pattern to the UK Biobank cohort.

There are significant limitations to this replication study that need to be highlighted. Firstly, there is a significant discrepancy between the mean ages of the CTS cases in the two cohorts (69 in UK Biobank vs 50 in EGCUT). The graph showing the age distribution of the EGCUT cases and controls demonstrates a near-normal distribution of CTS cases around the mean age of 50. Given that idiopathic CTS is very rare below the age of 40, it is particularly striking that the overall prevalence of CTS in the EGCUT cohort is substantially higher than in UK Biobank (8.5% vs 3.1%), even though the EGCUT cases are nearly 20 years younger than the UK Biobank cases. UK Biobank participants were recruited at ages 40-69 (the peak age for CTS incidence), and the prevalence was still under 5%. This leads us to conclude that the EGCUT cohort likely includes a substantial proportion of pregnancy-related CTS – a common and usually transient phenomenon due to fluid retention in pregnancy, which is quite distinct in terms of pathophysiology from idiopathic CTS. Further evidence for this is the discrepancy in the proportion of female CTS cases: 70% in UK Biobank vs 83% in EGCUT.

In terms of case ascertainment, in UK Biobank, we performed a validation study of CTS diagnoses by scrutinising hundreds of medical records of putative CTS cases, and determined that the positive predictive value of a CTS ‘case’ being a true case is 94%<sup>9</sup>. In addition, 94% of our CTS cases have at least one operation code, suggesting that our cohort are, on the whole, on the phenotypically more severe end of the spectrum. Finally, 80% of our CTS cases have at least one ICD-10 or OPCS code for CTS, meaning that our reliance on self-reported questionnaire diagnoses is very low.

However, the principal reason for the relative lack of replication of our SNPs in the EGCUT cohort is likely lack of statistical power. Despite having >4,000 cases, this still only represents approximately one-third of the cases included in the UK Biobank discovery cohort. With controls included, the EGCUT cohort is only 12% of the size of the UK Biobank cohort. Based on the number of Estonian cases and controls and the allelic odds ratios from our GWAS, we calculated the power to detect an association at the Bonferroni-corrected p-value threshold of  $p=0.0031$ , assuming a population disease prevalence of 5%. While we acknowledge the significant problems with *post hoc* calculations of statistical power<sup>10</sup>, it is apparent from the table below that we were significantly underpowered at the majority of loci; only at 4/16 loci do we have > 80% power to detect an association at this threshold, and that is assuming that the majority of the 4,087 cases are true cases of idiopathic CTS (as opposed to pregnancy-related CTS).



| SNP        | Power (4087 cases) |
|------------|--------------------|
| rs12406439 | 0.61               |
| rs12104955 | 0.51               |
| rs3791679  | 0.88               |
| rs1025128  | 0.63               |
| rs847139   | 0.56               |
| rs1863190  | 0.92               |
| rs4678145  | 0.39               |
| rs6843953  | 0.67               |
| rs3828889  | 0.68               |
| rs62422907 | 0.5                |
| rs55841377 | 0.39               |
| rs6977081  | 0.63               |
| rs72725608 | 0.45               |
| rs1866745  | 0.73               |
| rs72755233 | 0.99               |
| rs62621197 | 0.97               |

In summary, there are significant limitations in this replication attempt pertaining to case ascertainment, discrepancies in age and sex distribution and disease prevalence, and lack of power. Nevertheless, there is clearly strong evidence for shared genetic architecture for CTS between the two cohorts, as evidenced by the genetic risk scores, genetic correlation and directional concordance of the effect at the majority of loci. While EGCUT is a robust cohort for performing population-based studies, we feel that a formal replication study and meta-analysis needs to be conducted in a replication cohort of larger or comparable size to UK Biobank, where we can also be confident that we are comparing the same phenotype (i.e. idiopathic, rather than pregnancy-related CTS) between the discovery and replication samples.

## Supplementary References

1. Weiss T, Taschner-Mandl S, Bileck A, Slany A, Kromp F, Rifatbegovic F, Frech C, Windhager R, Kitzinger H, Tzou CH, Ambros PF, Gerner C, A. I. Proteomics and transcriptomics of peripheral nerve tissue and cells unravel new aspects of the human Schwann cell repair phenotype. *Glia* **64**, 2133–2153 (2016).
2. Leitsalu, L. *et al.* Cohort profile: Estonian biobank of the Estonian genome center, university of Tartu. *Int. J. Epidemiol.* **44**, 1137–1147 (2015).
3. Purcell, S. *et al.* PLINK: A Tool Set for Whole-Genome Association and Population-Based Linkage Analyses. *Am. J. Hum. Genet.* **81**, 559–575 (2007).
4. Loh, P. R. *et al.* Reference-based phasing using the Haplotype Reference Consortium panel. *Nat. Genet.* **48**, 1443–1448 (2016).
5. Browning, B. L. & Browning, S. R. Genotype Imputation with Millions of Reference Samples. *Am. J. Hum. Genet.* **98**, 116–126 (2016).
6. Mitt, M. *et al.* Improved imputation accuracy of rare and low-frequency variants using population-specific high-coverage WGS-based imputation reference panel. *Eur. J. Hum. Genet.* **25**, 869–876 (2017).
7. Marchini, J., Howie, B., Myers, S., McVean, G. & Donnelly, P. A new multipoint method for genome-wide association studies by imputation of genotypes. *Nat. Genet.* **39**, 906–913 (2007).
8. Bulik-Sullivan, B. *et al.* An atlas of genetic correlations across human diseases and traits. *Nat. Genet.* **47**, 1236–1241 (2015).
9. Lane, J. *et al.* Can we use routinely collected hospital and GP data for epidemiological study of common hand conditions? A UK Biobank based validation project. Preprint at <https://www.biorxiv.org/content/10.1101/274167v1> (2018).
10. Greenland, S. Nonsignificance Plus High Power Does Not Imply Support for the Null Over the Alternative. *Ann. Epidemiol.* **22**, 364–368 (2012).
